# Supplementary material
Source: PubMed Central journal article supplement (PMC7002984)
Supplement: mmc2.pdf [file mmc2.pdf]

# Structural Consequences of Multisite Phosphorylation in the BAK1 Kinase Domain

Alexander S. Moffett<sup>1</sup> and Diwakar Shukla<sup>1,2,3,4,5,\*</sup>

<sup>1</sup>Center for Biophysics & Quantitative Biology, <sup>2</sup>Department of Chemical & Biomolecular Engineering, <sup>3</sup>Department of Plant Biology, <sup>4</sup>NIH Center for Macromolecular Modeling and Bioinformatics, and <sup>5</sup>Beckman Institute for Advanced Science and Technology, University of Illinois at Urbana-Champaign, Urbana, Illinois

**ABSTRACT** Multisite phosphorylation is an important mechanism of post-translational control of protein kinases. The effects of combinations of possible phosphorylation states on protein kinase activity are difficult to study experimentally because of challenges in isolating a particular phosphorylation state; surprising little effort on this topic has been expended in computational studies. To understand the effects of multisite phosphorylation on the plant protein kinase brassinosteroid insensitive 1-associated kinase 1 (BAK1) conformational ensemble, we performed Gaussian accelerated molecular dynamics simulations on eight BAK1 mod-forms involving phosphorylation of the four activation-loop threonine residues and binding of ATP-Mg<sup>2+</sup>. We find that unphosphorylated BAK1 transitions into an inactive conformation with a “cracked” activation loop and with the  $\alpha$ C helix swung away from the active site. T450 phosphorylation can prevent the activation loop from cracking and keep the  $\alpha$ C helix in an active-like conformation, whereas phosphorylation of T455 only slightly stabilizes the activation loop. There is a general trend of reduced flexibility in interlobe motion with increased phosphorylation. Interestingly, the  $\alpha$ C helix is destabilized when the activation loop is fully phosphorylated but is again stabilized with ATP-Mg<sup>2+</sup> bound. Our results provide insight into the mechanism of phosphorylation-controlled BAK1 activation while at the same time represent the first, to our knowledge, comprehensive, comparative study of the effects of combinatorial phosphorylation states on protein kinase conformational dynamics.

**SIGNIFICANCE** Protein kinases are regulated through post-translational phosphorylation, serving as a control switch for catalytic activity. Often, protein kinases are regulated by multiple phosphorylation sites, which can have nonadditive effects on catalytic activity. However, the relationship between phosphorylation state and function is difficult to study experimentally and has not been extensively explored. Using molecular dynamics simulations, we study how different phosphorylation states impact the stability of the active-like conformation of an important plant protein kinase, brassinosteroid insensitive 1-associated kinase 1 (BAK1). We find that a single phosphorylation site is largely responsible for stabilizing the active-like state, although other phosphorylation sites play a smaller role in influencing BAK1 dynamics. Together with previous experimental evidence, this suggests that several phosphorylation sites influence BAK1 function through a different mechanism.

## INTRODUCTION

Protein kinases play the role of switches in the molecular circuitry of eukaryotic cells (1). Their ability to be switched on or off by phosphorylation while at the same time catalyzing phosphorylation of other proteins, often other protein kinases, allows for complex dynamics of a propagated signal at the cost of free energy (2,3). The central role of protein kinases in eukaryotic signaling pathways has driven

intense research efforts to understand the structural basis of their phosphorylation-controlled activity. From this work, a number of structural features have been identified, which can be used to tell whether a particular protein kinase conformation is inactive, despite the diversity of protein kinase activation mechanisms (4–6). These features include (Fig. 1) proximal positioning of the  $\alpha$ C helix with respect to the remainder of the N-lobe, stabilization of the activation loop in a conformation lying flat on the C-lobe, positioning of the DFG-motif-phenylalanine residue outside of the ATP-binding pocket (commonly called the DFG-in conformation), and binding of an ATP-Mg<sup>2+</sup> complex. The absence of any one of these features signifies a likely inactive protein

Submitted August 9, 2019, and accepted for publication December 10, 2019.

\*Correspondence: diwakar@illinois.edu

Editor: Alan Grossfield.

<https://doi.org/10.1016/j.bpj.2019.12.026>

© 2020 Biophysical Society.

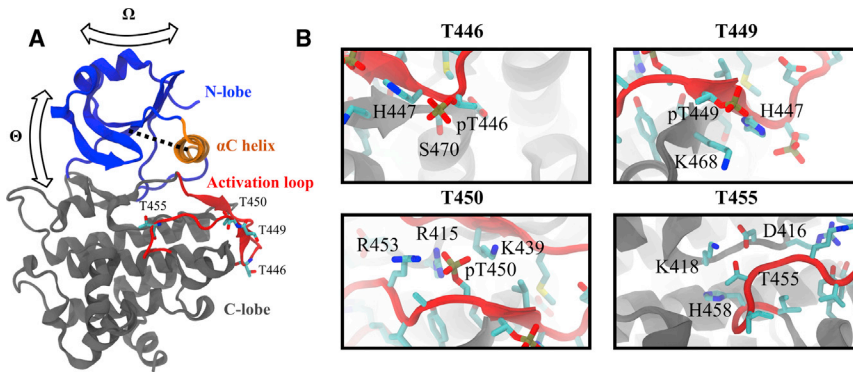

FIGURE 1 (A) A crystal structure of the BAK1 kinase domain in an active-like conformation (PDB: 3TL8 (20), chain A). The structure is coarsely partitioned into important regions of note for our analysis and color coded in a manner consistent throughout this article. The four threonine phosphorylation sites on the BAK1 activation loop are shown. The interlobe opening angle ( $\theta$ ) and twisting angle ( $\Omega$ ) as well as the  $\alpha$ C helix to N-lobe  $\beta$ -sheet distance are shown. (B) Close-up views of the four threonine phosphorylation sites on the BAK1 activation loop and nearby residues are shown. The threonine residues are phosphorylated as in the crystal structure. This figure was produced using VMD 1.9.2 (30) and Inkscape 0.91 (46). To see this figure in color, go online.

kinase, although formation of all features is no guarantee of activity. When the problem of interest is purely one of classification, automatic approaches based in machine learning can be used to identify active and inactive protein kinase conformations (7,8).

A number of experimental and computational studies have sought to understand how phosphorylation alters the structural ensembles, and consequently the phosphotransferase activity, of protein kinases. Dual phosphorylation of human ERK2 kinase has been shown to cause a conformational change in the activation loop (9,10) and promote interlobe dynamics (11). Kuzmanic et al. (12) used metadynamics simulations to study the effects of dual phosphorylation, ATP, and  $Mg^{2+}$  binding and substrate binding on the p38 $\alpha$  protein kinase free energy landscape, finding that dual phosphorylation is insufficient for activation. Although ATP- $Mg^{2+}$  binding further stabilized the active-like conformations, the presence of all factors was found to be necessary for stabilization of the active-like conformation. We note that the presence of ATP and  $Mg^{2+}$  is necessary for a kinase to be functionally active, and we refer to conformations with the characteristics of the active state but without ATP and  $Mg^{2+}$  bound as active like. Ruff et al. (13) used spectroscopic methods coupled with molecular dynamics (MD) simulations to study the activation of Aurora kinase A, finding that phosphorylation of a single site stabilizes an active conformation of the activation loop within the DFG-in ensemble. Although these and other studies (14) have provided physical insight into phosphorylation-induced activation of protein kinases, very little work has focused on understanding the relationships between the combinatorial space of phosphorylation sites and protein kinase activation. Such relationships are important to understand because mappings of phosphorylation state to function, from rheostat-like behavior in which phosphotransfer activity is proportional to the number of phosphorylated sites to epistatic mappings with nonlinear relationships between phosphorylation sites and function, have significant consequences on signaling network dynamics (2,15).

Brassinosteroid insensitive 1-associated kinase 1 (BAK1) is a leucine-rich repeat (LRR) receptor-like kinase (RLK) responsible for initiation of several growth and immune signaling pathways in plants (16,17). BAK1 acts as a coreceptor to a number of other LRR-RLKs with larger LRR domains, associating with its coreceptors upon ligand binding and subsequently triggering either unidirectional or bidirectional phosphorylation of the intracellular kinase domains (16–19). Although a great deal of effort has gone into understanding the signaling pathways in which BAK1 is involved, the physicochemical basis of BAK1 activation through phosphorylation remains unclear, although crystal structures of the BAK1 kinase domain (Fig. S1) have provided important clues (20,21) and our computational work has explored BAK1 kinase domain conformational dynamics (22–24).

Previously, Wang et al. (25) used a combination of in vitro kinase activity assays and mass spectrometry to explore the effects of mutating BAK1 phosphorylation sites on its activity toward a number of its LRR-RLK substrates. Their study revealed differential phosphorylation of LRR-RLK targets by BAK1 in vitro with different BAK1 phosphorylation patterns produced through mutations. Their results suggest that at least for phosphorylation of the other kinase domains tested, the BAK1 activation-loop residues T450 and T455 are the most important phosphorylation sites, followed by T446 and T449 and subsequently S290 and T312. These results raise the possibility that the phosphorylation pattern of BAK1 controls its specificity toward its many substrates, further supported by evidence that distinct sets of phosphorylation sites control BAK1 activity within brassinosteroid and immune signaling pathways (26). Other results from kinase activity assays using a peptide substrate found that a T455A mutation of BAK1, preventing T455 phosphorylation, had the largest effect on BAK1 activity, whereas mutation of the other three activation-loop threonine residues (T446, T449, T450) had less of an effect (27).

The experimental study of the mapping from phosphorylation states to protein conformational ensembles, and consequently function, are greatly complicated by difficulties in isolating specific phosphorylation states. On the

other hand, all-atom computational models have no such difficulty while revealing physicochemical details underlying the behavior of a protein and thus present an attractive avenue for studying post-translational control of protein kinase function. In our view, a complete explanation of the mechanisms of protein kinase phosphorylation-controlled activity and specificity would require exploration of changes in the phosphotransfer reaction itself through quantum mechanics/molecular mechanics simulations, the BAK1 conformational ensemble through classical MD simulations, and the thermodynamics and kinetics of BAK1-substrate association through biased and/or coarse-grained MD. In this study, we focus on the second of these levels of biomolecular dynamics, exploring the impact of seven phosphorylation states constructed from the four threonine phosphorylation sites on the activation loop of BAK1, as well as the presence of ATP in the binding pocket on the conformational ensemble of BAK1. We used Gaussian accelerated MD (GAMD) simulations (28) to efficiently explore the conformational space of each mod-form without the need to define any collective variables on which to perform enhanced sampling.

Given the conserved structural features of protein kinases necessary for catalysis of phosphotransfer reactions (4), we compare the free energy landscapes over these features across all eight mod-forms, a term coined to generally describe modification states of proteins (29), to gain insight into how phosphorylation of BAK1 activation-loop residues individually and collectively affects the conformational aspect of BAK1 activation. We find that the activation loop of the unphosphorylated BAK1 kinase domain “cracks” and forms what is likely an inactive conformation. Phosphorylation of T450 alone, which is surrounded by positive residues in crystal structures (20,21), can prevent activation-loop cracking and hold the BAK1 activation loop in a largely active-like conformation. Phosphorylation of the four activation-loop threonine residues appears to additively reduce interlobe angular flexibility, in which the presence of ATP in the ATP-binding pocket ultimately promotes a more closed conformation. The  $\alpha$ C helix is able to swing outward in the unphosphorylated state, whereas it appears unable to do so in the presence of any phosphorylation state we have examined. Additionally, the  $\alpha$ C helix appears to remain largely intact except when all four activation-loop threonine residues are phosphorylated and ATP is not present.

Our results suggest that phosphorylation of T450 is the most important factor for controlling the features of activation that we have examined and provide an expanded structural basis for the primary importance of T450 and T455 phosphorylation in BAK1 activation. More generally, our study represents, to our knowledge, the first investigation of the relationship between combinatorial multisite phosphorylation in protein kinases and their conformational ensembles, revealing structural details underlying post-translational control of an important protein kinase.

## METHODS

### System setup

All systems were set up using the psfgen plugin within VMD (30). The CHARMM 36 force field (31) was used for protein atoms. The protein atoms of the core BAK1 kinase domain were taken from a crystal structure (Protein Data Bank, PDB: 3TL8, chain A (20)), and all phosphoryl group atoms were removed. The desired phosphoryl groups for each system were added within psfgen, along with hydrogen atoms. The BAK1 structure was then solvated in a box of TIP3P (32) water molecules so that the edges of the box were 10 Å from any protein atom. Cl<sup>-</sup> and Na<sup>+</sup> ions were added to neutralize each system and bring the salt concentration to ~150 Mm. To add ATP and Mg<sup>2+</sup> to BAK1, a PKA crystal structure (PDB: 4HPU (33)) containing AMP-PNP and two associated Mg<sup>2+</sup> ions was aligned to BAK1 (PDB: 3TL8, chain A) using the MultiSeq VMD plugin (34), and the resulting AMP-PNP and Mg<sup>2+</sup> coordinates were used to place ATP and Mg<sup>2+</sup> into the BAK1 ATP-binding pocket. The ParmEd tool within AmberTools 18 (35) was used to convert X-PLOR format structure and topology files into Amber format.

### Simulation details

All simulations were run in Amber18 (35) with a time step of 2 fs and with hydrogen-containing bonds constrained using the SHAKE algorithm (36). All production runs were maintained at constant temperature of 300 K using a Langevin thermostat with a coupling time constant of 2 ps and at a constant pressure of 1 bar using a Berendsen barostat with a  $\tau$  of 1 ps. The particle mesh Ewald method (37) was used to treat electrostatics, and a cutoff of 10 Å was used for nonbonded interactions. Frames were saved to trajectory files every 10 ps.

All systems were subjected to energy minimization. For each of the eight systems, we initiated 10 independent simulations starting from the equilibration step and following the same procedure from then on. Each replicate was equilibrated for 20 ns and then run for an additional 26 ns to collect statistics for determination of GAMD (38) parameters. Using these parameters, independently estimated for each replicate, we ran 500 ns of GAMD simulations for each replicate, amounting to 5  $\mu$ s of aggregate simulation time for each system.

### Definitions of collective variables

#### N-lobe to C-lobe angles

We defined two angles between the BAK1 N-lobe and C-lobe to monitor twisting and bivalve-like opening motions. We defined the N-lobe  $\beta$ -sheet using the backbone atoms of residues 302–307, 313–319, and 360–364, and we defined the  $\alpha$ E-helix using the backbone atoms of residues 388–406. For both sets of atoms in each frame, we calculated the inertia tensor:

$$\mathbf{I} = \sum_{i=1}^N m_i (\mathbf{x}_i \cdot \mathbf{x}_i \mathbf{E} - \mathbf{x}_i \otimes \mathbf{x}_i), \quad (1)$$

where  $N$  is the number of atoms,  $m_i$  is the mass of atom  $i$ ,  $\mathbf{x}_i$  is the Cartesian coordinate column vector of atom  $i$ , and  $\mathbf{E}$  is the identity tensor. Diagonalizing  $\mathbf{I}$  yields

$$\mathbf{I} = \mathbf{Q}\mathbf{\Lambda}\mathbf{Q}^T, \quad (2)$$

where the columns of  $\mathbf{Q}$  contain the principal axes of rotation and  $\mathbf{\Lambda}$  is a diagonal matrix of the moments of inertia. We use the principal axis with the smallest corresponding moment of inertia to define the axis of the BAK1 N-lobe  $\beta$ -sheet, roughly parallel to the backbone in the sheet, and the helical axis of the  $\alpha$ E-helix. We call these axes  $\mathbf{a}_\beta$  and  $\mathbf{a}_{\alpha E}$ , respectively.

We note that one must take care to ensure that each axis has a consistent direction, related by multiplication by  $-1$ . A third vector in the C-lobe was defined by taking the center of mass of backbone atoms of residues 388–391 ( $\mathbf{c}_{\alpha E}$ ) at one end of the  $\alpha E$ -helix and of backbone atoms of residues 483–487 ( $\mathbf{c}_{\alpha F}$ ) in the adjacent  $\alpha F$ -helix, and calculating  $\mathbf{c}_{\alpha F-\alpha E} = \mathbf{c}_{\alpha F} - \mathbf{c}_{\alpha E}$ . The vectors  $\mathbf{a}_{\alpha E}$  and  $\mathbf{c}_{\alpha F-\alpha E}$  were used to define a C-lobe plane with a normal vector:

$$\mathbf{n}_C = \frac{\mathbf{a}_{\alpha E} \times \mathbf{c}_{\alpha F-\alpha E}}{\|\mathbf{a}_{\alpha E} \times \mathbf{c}_{\alpha F-\alpha E}\|}, \quad (3)$$

and the projection of  $\mathbf{a}_{\beta,C}$  onto the C-lobe plane was defined as  $\mathbf{a}_{\beta,C} = \mathbf{a}_{\beta} - (\mathbf{a}_{\beta} \cdot \mathbf{n}_C)\mathbf{n}_C$ . Then, the opening angle  $\Theta$  can be defined as

$$\Theta = 90 - \frac{180}{\pi} \arccos\left(\frac{\mathbf{a}_{\beta} \cdot \mathbf{n}_C}{\|\mathbf{a}_{\beta}\|}\right), \quad (4)$$

and the twisting angle  $\Omega$  can be defined as

$$\Omega = \frac{180}{\pi} \arccos\left(\frac{\mathbf{a}_{\beta,C} \cdot \mathbf{a}_{\alpha E}}{\|\mathbf{a}_{\beta,C}\| \|\mathbf{a}_{\alpha E}\|}\right). \quad (5)$$

### Other collective variables

To measure its helical content, the  $\alpha C$  helix was defined as residues 324–339. Helical content was measured according to the definition in the NAMD collective variable-based calculations manual (39). The activation loop was defined as residues 437–459, and the C-lobe excluding the activation loop, defined as residues 368–436 and residues 460–576, was used to align BAK1 to the crystal structure. The root mean-square deviation (RMSD) of the activation loop in each frame compared to the crystal structure was then measured. Swinging of the  $\alpha C$  helix was described by the distance between the centers of mass of the previously chosen sets of atoms defining the  $\alpha C$  helix ( $\mathbf{c}_{\alpha C}$ ) and the N-lobe  $\beta$ -sheet ( $\mathbf{c}_{\beta}$ ). The DFG flip CV was defined as the distance between L404  $\alpha$ -carbon and C4 of the F435 side chain minus the distance between D416  $\alpha$ -carbon and C4 of the F435 side chain.

### Unbiased PMFs from GAMM

We used the multistate Bennett acceptance ratio (MBAR) (40) to reweight samples from GAMM simulations. The MBAR estimator provides estimates of relative free energies and their covariance across different thermodynamic states. Using these relative free energy estimates, one can estimate unbiased potentials of mean force (PMFs) from samples produced by biased MD simulations, as in the case of GAMM. All MBAR analysis was done using pymbar 3.0.4 (41).

Typically, when using MBAR, PMFs are estimated through expectations using reweighted samples:

$$F_i = -\beta^{-1} \log \langle \chi_i(\mathbf{x}) \rangle, \quad (6)$$

where  $\chi_i(\mathbf{x})$  is a function taking a value of 1 if  $\mathbf{x}$  falls into bin  $i$  and 0 otherwise. To produce smooth PMFs, we instead use Gaussian basis functions:

$$g_k(\boldsymbol{\xi}, \boldsymbol{\xi}_0) = \frac{1}{\sqrt{(2\pi)^k \sigma^2}} e^{-\frac{1}{2\sigma^2}(\boldsymbol{\xi} - \boldsymbol{\xi}_0)^T (\boldsymbol{\xi} - \boldsymbol{\xi}_0)}, \quad (7)$$

where  $\boldsymbol{\xi} \in \mathbb{R}^k$  is the variable vector of interest, and  $\sigma$  is the bandwidth of the basis functions. In our analysis,  $k \in \{1, 2\}$ . We assume zero local covariance between variables. The unbiased probability density is then estimated as an MBAR expectation value as follows:

$$p(\boldsymbol{\xi}) = \langle g_k(\boldsymbol{\xi}, \boldsymbol{\xi}(\mathbf{x})) \rangle, \quad (8)$$

where  $\boldsymbol{\xi}(\mathbf{x})$  is the function mapping the full configuration  $\mathbf{x} \in \mathbb{R}^{3N}$  of a frame to the collective variable vector  $\boldsymbol{\xi}$ . We estimate the PMF as follows:

$$F(\boldsymbol{\xi}) = -\beta^{-1} \log p(\boldsymbol{\xi}), \quad (9)$$

subtracting an estimate of  $\min_{\boldsymbol{\xi}} [F(\boldsymbol{\xi})]$  from each  $F(\boldsymbol{\xi})$ .

### RMSFs

The root mean-square fluctuations (RMSFs) of BAK1  $\alpha$ -carbons were estimated from MD simulations by first aligning all frames to the crystal structure  $\alpha$ -carbons and calculating  $\alpha$ -carbon displacements according to

$$\Delta d_i(t) = \|\mathbf{x}_{C\alpha,i}(t) - \mathbf{x}_{C\alpha,i}^{crystal}\|, \quad (10)$$

where  $\mathbf{x}_{C\alpha,i}(t)$  is the coordinate vector for the  $\alpha$ -carbon of residue  $i$  at time  $t$ , and  $\mathbf{x}_{C\alpha,i}^{crystal}$  is the coordinate vector of the same residue  $\alpha$ -carbon in the crystal structure. The RMSF of  $\alpha$ -carbons were then obtained according to

$$R_i = \sqrt{\langle (\Delta d_i - \langle \Delta d_i \rangle)^2 \rangle}, \quad (11)$$

where the ensemble averages were estimated in the unbiased ensemble using MBAR.

### General analysis

The structural alignment shown in Fig. S1 was performed using MultiSeq (34) within VMD 1.9.3. A large portion of analysis in Python was done using Jupyter Notebooks (42).

## RESULTS

### A “canonical” inactive conformation of the BAK1 kinase domain

In GAMM simulations of the unphosphorylated BAK1 kinase domain, BAK1 underwent conformational changes into structures displaying classic characteristics of an inactive kinase domain (Fig. 2). The  $\alpha C$  helix was able to swing away from the N-lobe into a metastable state with an  $\alpha C$  helix to N-lobe  $\beta$ -sheet distance of around 1.8 nm in contrast to 1.5 nm in active-like conformations. The activation loop also underwent a conformational change, “cracking” in half into a far more open structure with an overall RMSD from the crystal structure of around 1.0 nm. This apparently metastable, inactive state is only accessible from the active-like state when the activation loop first begins to crack, followed by swinging of the  $\alpha C$  helix.

There was no flip from the DFG-in to DFG-out conformation (Fig. S18) in unphosphorylated BAK1 nor in any mod-form, as indicated by the purely negative values of the DFG flip CV defined in the Methods. However, the same DFG flip CV reveals a conformational change in the catalytic loop of unphosphorylated BAK1 (Fig. S18 A). The higher stability

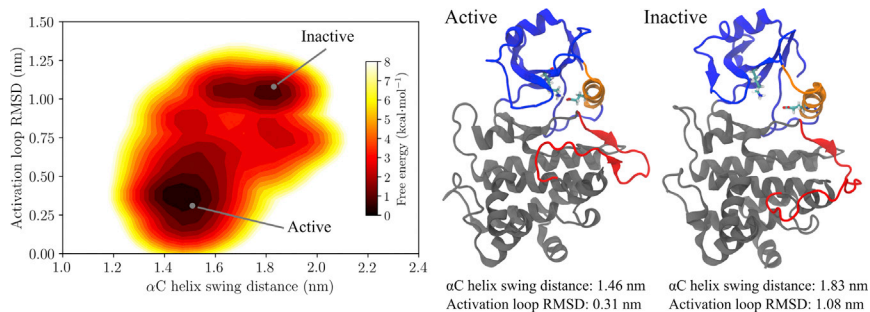

FIGURE 2 Left, the free energy landscape over  $\alpha$ C-helix swinging distance and activation-loop RMSD to a crystal structure (PDB: 3TL8 (20), chain A) for the unphosphorylated BAK1 kinase domain. The locations of the two structures shown on the right, taken from trajectories, are indicated. The right section shows structures from simulations representing the metastable active-like and inactive free energy basins. Note the cracking of the activation loop and swinging of the  $\alpha$ C helix away from the rest of the N-lobe in the inactive structure. Additionally, the  $\alpha$ C helix in the inactive structure has partially unfolded. This figure was produced using VMD 1.9.2 (30), Matplotlib 1.5 (47), and Inkscape 0.91 (46). To see this figure in color, go online.

of conformations with DFG flip CVs less than  $-0.5$  in unphosphorylated and pT455 BAK1 results from a flip of the catalytic loop away from the active site (Fig. S19), resulting in a greater distance between D416 and F435. This catalytic loop conformational change constitutes further movement from the active-like BAK1 structure in both the unphosphorylated and pT455 proteins.

### Phosphorylation, especially of T450, stabilizes the active-like conformation

We calculated the RMSF of the BAK1  $\alpha$ -carbons in each mod-form to evaluate the effects of phosphorylation and ATP binding on overall backbone fluctuations. The BAK1 activation loop had large RMSF values in the unphosphorylated state (Fig. 3), indicating a high degree of structural motion. In comparison, the RMSF of the activation loop and the region from residues 475–525 is greatly reduced in the pT450 state, in addition to every other state in which T450 is phosphorylated. Although the RMSF of the activation loop is slightly reduced in the pT455 state as compared to the unphosphorylated state, the pT455 state has a higher RMSF in this region in comparison to all other states. These results suggest that phosphorylation of T450 may be critical for stabilizing the activation loop. Very little difference in the RMSF of the  $\alpha$ C helix is apparent across all mod-forms.

To further examine the effects of mod-form on activation-loop dynamics and  $\alpha$ C-helix motion, we calculated PMFs over the  $\alpha$ C-helix swing distance and activation-loop RMSD to a crystal structure (PDB: 3TL8 (20), chain A), both as described in the Methods. In agreement with our RMSF calculations, the BAK1 activation loop is able to explore a large range of conformations in the unphosphorylated state, as indicated by free energy minima at activation-loop RMSDs of 0.4 and 1.0 nm (Fig. 4 A). At the same time, the  $\alpha$ C helix can swing out into its inactive conformation but only after the activation loop has changed conformation. Phosphorylation of T450 eliminates the second inactive minimum and stabilizes the activation loop at an RMSD of around 0.25 nm (Fig. 4 B). Phosphorylation of T455 alone

appears to stabilize the activation loop to a small extent as compared to the unphosphorylated state (Fig. 4 C), again yielding two minima in the PMF, although the second minimum is shifted down to an activation-loop RMSD of around 0.6 nm. All other mod-form RMSD PMFs are similar to that of the pT450 state, although in the pT450-pT455-pT446 state, a second minimum in the PMF is evident, 2–3 kcal·mol<sup>-1</sup> less stable than the active-like state. In all mod-forms with any degree of phosphorylation, BAK1 exists in a single free energy basin in terms of  $\alpha$ C-helix

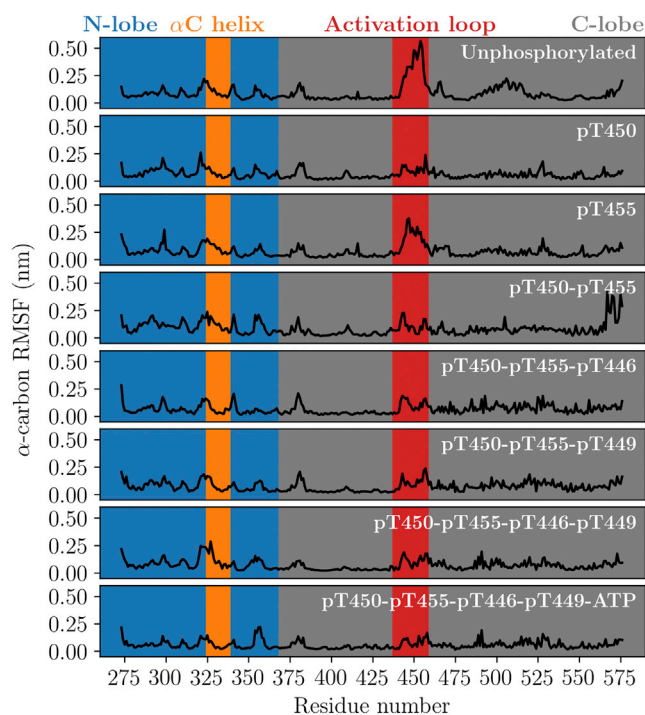

FIGURE 3  $\alpha$ -carbon RMSF of the BAK1 kinase domain for each mod-form calculated from GAMM simulations, reweighted using MBAR. Phosphorylation of T450 reduces the large activation-loop fluctuations seen in the unphosphorylated state, whereas phosphorylation of T455 is insufficient for activation-loop stabilization. This figure was produced using Matplotlib 1.5 (47). To see this figure in color, go online.

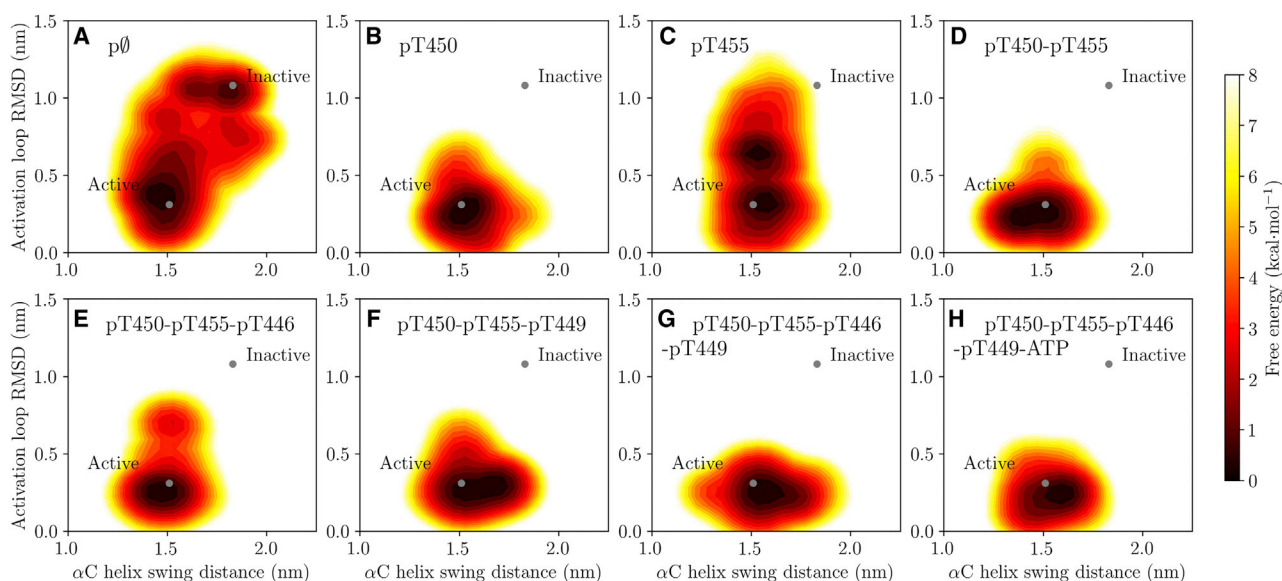

FIGURE 4 PMFs over the BAK1  $\alpha$ C helix to N-lobe  $\beta$ -sheet center of mass distance and activation-loop RMSD with respect to a crystal structure (PDB: 3TL8 (20), chain A). The notation  $p\emptyset$  is used as shorthand for the unphosphorylated BAK1 kinase domain. The PMFs were calculated from GAMD simulations, reweighted using MBAR. This figure was produced using Matplotlib 1.5 (47). To see this figure in color, go online.

swinging distance. Overall, there appears to be a trend toward a larger swinging distance with more phosphorylation.

We evaluated the convergence of each PMF with sampling time (Figs. S2–S9), finding that all PMFs except for that of unphosphorylated BAK1 appear to have converged. However, the time series plots of unphosphorylated BAK1 in Figs. S2–S9 indicate that the large structural fluctuations implied by the corresponding PMF are not due to a single aberrant trajectory but reflect the behavior of several of the 10 trajectories. Additionally, we examined the effects of different bandwidths in the Gaussian basis functions used to estimate each PMF (Figs. S10–S17), finding no significant qualitative differences in the PMFs when using different bandwidths.

In previous work, we found local unfolding in the BAK1  $\alpha$ C helix (22,23). In all mod-forms simulated here, there was a certain degree of local  $\alpha$ C-helix unfolding at its N-terminal end. However, for most mod-forms the  $\alpha$ C helix remained stable at around 75% helical content (Fig. 5). Interestingly, when the BAK1 activation loop is fully phosphorylated but ATP is not present, a partially unfolded  $\alpha$ C helix becomes more favorable (Fig. 5 G). Binding of ATP and  $Mg^{2+}$  appears to again promote a stable  $\alpha$ C helix at 75% helical content (Fig. 5 H). The presence of local unfolding of the  $\alpha$ C helix is in part consistent with previous results (22), even though in this case we do not consider phosphorylation of T324 adjacent to the  $\alpha$ C helix and we observe a relatively stable  $\alpha$ C helix once ATP and  $Mg^{2+}$  are bound.

Additionally, phosphorylation of BAK1 constrains inter-lobe dynamics in our simulations. In unphosphorylated BAK1, the opening ( $\theta$ ) and twisting ( $\Omega$ ) angles span larger

ranges than in any other mod-form (Fig. S20). Two free energy minima exist in unphosphorylated BAK1, where the minimum with  $\Omega \approx 75^\circ$  and  $\theta \approx 5^\circ$  corresponds to a conformation with a largely open conformation. In contrast, when the BAK1 activation loop is fully phosphorylated and ATP and  $Mg^{2+}$  are bound, the N-lobe  $\beta$ -sheet is stabilized at an angle of around  $60^\circ$  and the N-lobe takes a slightly positive opening angle, likely as a result of accommodating ATP (Fig. S20 H).

### Phosphosite contact probabilities

To better understand the physical mechanism through which phosphorylation affects BAK1 dynamics, we calculated MBAR reweighted contact probabilities for each of the activation-loop threonine residues with all other protein residues, using a cutoff distance of 0.4 nm and considering the minimum distance between pairs of heavy atoms.

Aside from its neighboring residues, the T446 side chain largely does not form any strong contacts (Fig. S21). In several mod-forms, T446 is in contact with one or both M441 and M551, both unlikely to be because of any direct interactions between T446 and either residue. Similarly, the T449 side chain does not maintain contact with many residues (Fig. S21), except for K468, regardless of whether T449 is phosphorylated, and R415 and K439. The fact that T449 is in contact with R415, K439, and L329 only in the unphosphorylated and pT455 mod-forms suggests that these contacts may form because of activation-loop fluctuations.

As in crystal structures (Fig. 1; (20,21)), T450 contacts R415, K439, Y463, and K468 in the active-like

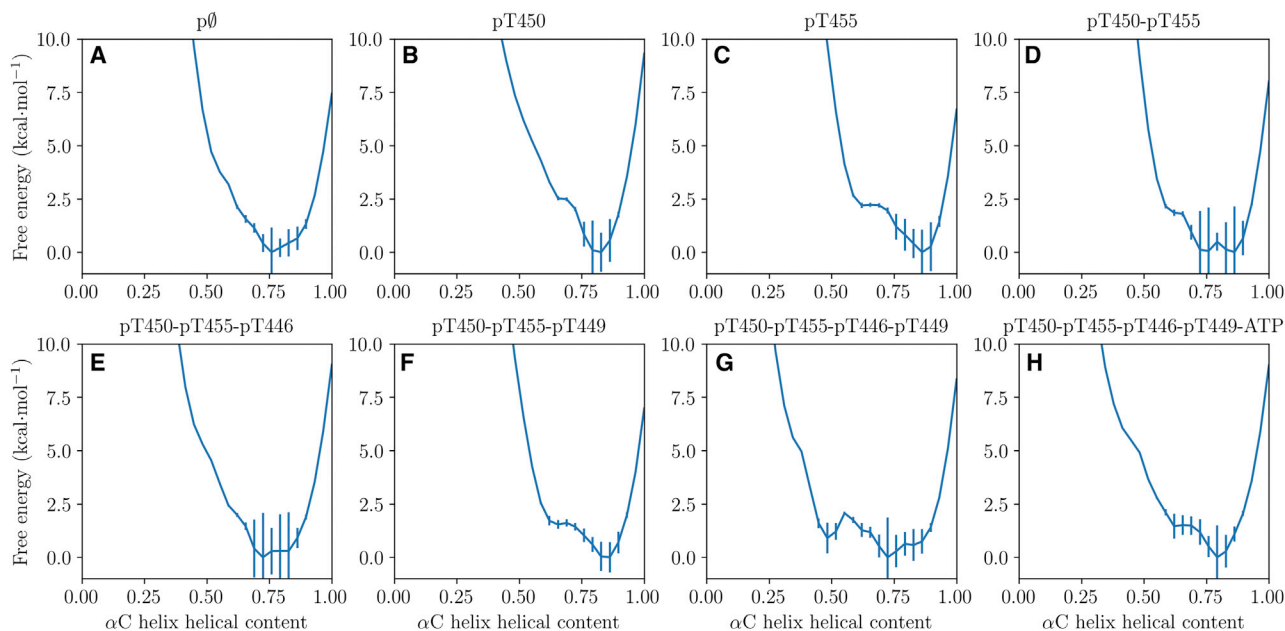

FIGURE 5 PMFs over the BAK1  $\alpha$ C-helix helical content. The notation  $p\phi$  is used as shorthand for the unphosphorylated BAK1 kinase domain. The PMFs were calculated from GAMD simulations, reweighted using MBAR, and error bars are MBAR standard deviations. This figure was produced using Matplotlib 1.5 (47). To see this figure in color, go online.

activation-loop conformation (Fig. 6). It is precisely these interactions between pT450 and the positively charged R415, K439, and K468 that are likely to be responsible for the ability of T450 to stabilize the activation loop in an active-like conformation, as suggested by the reduced contact probabilities in the unphosphorylated and pT455 mod-forms. It is clear from the T450 contact probabilities that phosphorylation of T450 itself is alone responsible for promoting these interactions, as in the pT455 state, the T450 contacts are far less often formed, whereas at the same time, the T450 contact probabilities in the pT450 state are essentially identical to all other mod-forms containing a phosphorylated T450.

Finally, the contacts of T455 indicate that T455 phosphorylation directly plays some role in influencing the interlobe dynamics by interacting with R297 on the N-lobe (Fig. 6). This contact is weak in the unphosphorylated state but is only absent in the pT450 and ATP-bound state, possibly because of the increased opening angle induced by ATP and  $Mg^{2+}$  binding (Fig. S20). Phosphorylation of T455 appears to promote interaction with R418, potentially explaining how T455 phosphorylation plays a role in weakly stabilizing the activation loop.

## DISCUSSION

We have described the effects of seven phosphorylation patterns (including the null, unphosphorylated, pattern) and ATP binding on the conformational dynamics of the BAK1 kinase domain. We have identified what may be a canonical, metastable inactive BAK1 kinase domain confor-

mation, characterized by activation-loop cracking. This activation-loop conformational change is reminiscent of human ERK2 kinase, which takes on a similarly cracked activation-loop conformation when unphosphorylated (9), while taking on an active-like conformation when doubly phosphorylated (10). From our simulations, it appears that phosphorylation of T450 is most important for maintaining an active-like activation-loop conformation, whereas T455 phosphorylation may play a role in further stabilizing the activation loop. All examined phosphorylation states promote proximal positioning of the  $\alpha$ C helix to the remainder of the N-lobe as compared to the unphosphorylated state, where the  $\alpha$ C helix can swing into an inactive conformation only after a conformational change in the activation loop.

It is difficult to make comparisons with the available experimental data in a meaningful way because of the combination of means through which phosphorylation of a residue could influence the activity of BAK1 toward a given target. Purely in terms of BAK1 conformational dynamics, the T450 phosphorylation site appears to be most important for stabilizing a crystal-structure-like conformation. Phosphorylation of T455 appears to be of secondary importance, significantly stabilizing the activation loop only when T450 is also phosphorylated. From our results, T446 and T449 phosphorylation does not appear to significantly contribute toward stabilizing an active-like BAK1 conformation. By mutating BAK1 phosphorylation sites to alanine and examining the amount of phosphorylated substrate in vitro, several groups have found that T450 and T455 are likely the most functionally important sites, whereas T446 and T449 are less important because of the smaller effect of their

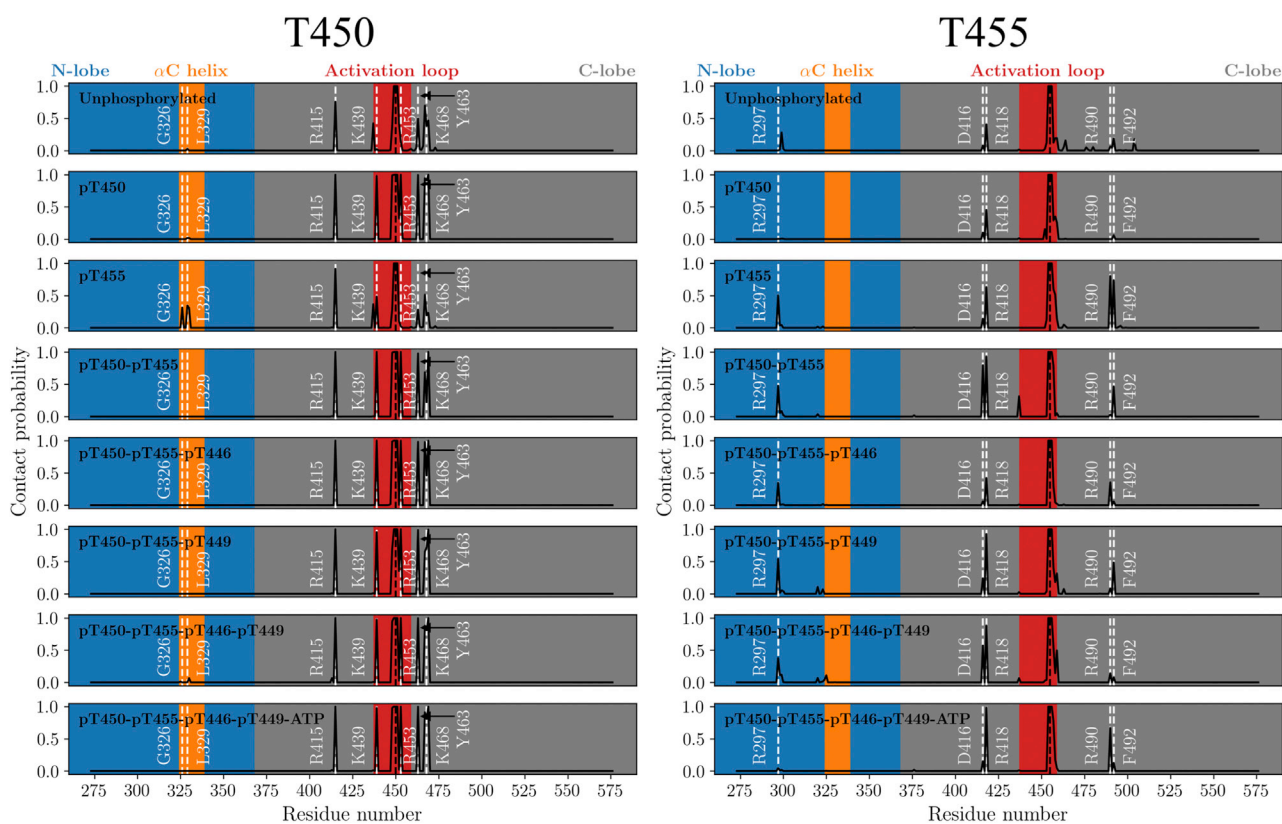

FIGURE 6 Contact probabilities for BAK1 T450 and T455 in each mod-form, reweighted using MBAR. The black dotted lines represent the reference threonine residue, whereas the white dotted lines denote contacting residues of interest. This figure was produced using Matplotlib 1.5 (47). To see this figure in color, go online.

mutation to alanine on substrate phosphorylation levels (25,27). However, it is unclear whether mutation of T455 has a larger effect than mutation of T450 (27) or if mutation of either has a similar effect, although this likely depends on the substrate.

As mentioned in the **Introduction**, we specifically focused on the effects of phosphorylation and ATP binding on the BAK1 kinase domain conformational dynamics, neglecting the possible effects of these changes to BAK1 on the catalyzed phosphotransfer reaction itself and on association with substrates. Although phosphorylation of T446 and T449 does not appear to affect BAK1 conformational dynamics significantly, it is possible that pT446 and pT449 play an important role in recognition of specific BAK1 substrates. Similarly, pT450 and pT455 may play some role in association with substrates or may alter the free energy landscape associated with phosphotransfer from ATP to the substrate. Both of these possibilities require future investigation.

For any BAK1 conformation to be active, ATP and  $Mg^{2+}$  must be bound. Ideally, we would have simulated each BAK1 phosphorylation state with and without ATP bound. However, we chose to examine ATP-bound BAK1 when all four activation-loop sites were phosphorylated to reduce the number of simulations required. We based this choice on the reasoning that mutation of any one of the activation-loop

phosphorylation sites reduces BAK1 activity (25,27) so that it is reasonable to assume that pT450-pT455-pT446-pT449 BAK1 is a minimally phosphorylated, fully active kinase when ATP is bound.

It is important to note that as with any MD simulations of proteins, the total amount of sampling we have done is likely inadequate to completely describe the global conformational dynamics of the BAK1 kinase domain relevant to its biological function, even with the GAMMD boost potentials applied. Although examples of estimated activation-loop timescales in other protein kinases are available, for example, in human Src kinase (43), it is difficult to know a priori how BAK1 activation-loop timescales will compare. Given the hierarchical structure of protein free energy landscapes (44,45), we could continue to simulate BAK1 on longer timescales while continuing to observe new behaviors with slower associated kinetics to no end. Still, it is likely that the behavior we have observed is relevant to dynamics in the local region of conformational space around the crystal structure, where all  $\alpha$ C-helix swing distance and activation-loop RMSD PMFs appear locally converged with the exception of unphosphorylated BAK1 (Figs. S2–S9). Even though this unphosphorylated BAK1 PMF does not appear to be fully converged, the large fluctuations observed in several independent trajectories (Fig. S2) support the qualitative conclusions of this article.



One final factor influencing our results that must be discussed is our choice of starting crystal structure. Of the six available structures of the BAK1 kinase domain (Fig. S1), we chose chain A of PDB: 3TL8 (20). This structure, along with the three other chains of PDB: 3TL8, was acquired with the bacterial protein AvrPtoB bound to BAK1, inhibiting its kinase activity. The remaining two structures (21) are not bound to AvrPtoB. Although all six structures are similar (Fig. S1), with similar structural features indicating active-like conformations (Fig. S22), the structures corresponding to PDB: 3UIM and 3ULZ have partially disordered and thus partially resolved  $\alpha$ C helices. We chose PDB: 3TL8 chain A because its highly ordered  $\alpha$ C helix more closely resembles that of an idealized active-like protein kinase once the inhibiting AvrPtoB protein is removed. We also note that PDB: 3UIM and 3ULZ differ from all chains of PDB: 3TL8 slightly in the activation-loop conformation. It is likely that choosing PDB: 3UIM or 3ULZ as our starting structure would impact our results, but we believe that choosing a more active-like structure that did not require local structure prediction was the best possible option.

## SUPPORTING MATERIAL

Supporting Material can be found online at <https://doi.org/10.1016/j.bpj.2019.12.026>.

## AUTHOR CONTRIBUTIONS

A.S.M. and D.S. designed the research. A.S.M. performed the research and wrote the manuscript with input from D.S.

## REFERENCES

- Bray, D. 1995. Protein molecules as computational elements in living cells. *Nature*. 376:307–312.
- Tyson, J. J., K. C. Chen, and B. Novak. 2003. Sniffers, buzzers, toggles and blinkers: dynamics of regulatory and signaling pathways in the cell. *Curr. Opin. Cell Biol.* 15:221–231.
- Kholodenko, B. N. 2006. Cell-signalling dynamics in time and space. *Nat. Rev. Mol. Cell Biol.* 7:165–176.
- Taylor, S. S., and A. P. Kornev. 2011. Protein kinases: evolution of dynamic regulatory proteins. *Trends Biochem. Sci.* 36:65–77.
- Taylor, S. S., M. M. Keshwani, ..., A. P. Kornev. 2012. Evolution of the eukaryotic protein kinases as dynamic molecular switches. *Philos. Trans. R. Soc. Lond. B Biol. Sci.* 367:2517–2528.
- Endicott, J. A., M. E. Noble, and L. N. Johnson. 2012. The structural basis for control of eukaryotic protein kinases. *Annu. Rev. Biochem.* 81:587–613.
- McSkimming, D. I., K. Rasheed, and N. Kannan. 2017. Classifying kinase conformations using a machine learning approach. *BMC Bioinformatics*. 18:86.
- Modi, V., and R. L. Dunbrack, Jr. 2019. Defining a new nomenclature for the structures of active and inactive kinases. *Proc. Natl. Acad. Sci. USA*. 116:6818–6827.
- Zhang, F., A. Strand, ..., E. J. Goldsmith. 1994. Atomic structure of the MAP kinase ERK2 at 2.3 Å resolution. *Nature*. 367:704–711.
- Canagarajah, B. J., A. Khokhlatchev, ..., E. J. Goldsmith. 1997. Activation mechanism of the MAP kinase ERK2 by dual phosphorylation. *Cell*. 90:859–869.
- Xiao, Y., T. Lee, ..., N. G. Ahn. 2014. Phosphorylation releases constraints to domain motion in ERK2. *Proc. Natl. Acad. Sci. USA*. 111:2506–2511.
- Kuzmanic, A., L. Sutto, ..., M. Orozco. 2017. Changes in the free-energy landscape of p38 $\alpha$  MAP kinase through its canonical activation and binding events as studied by enhanced molecular dynamics simulations. *eLife*. 6:e22175.
- Ruff, E. F., J. M. Muretta, ..., N. M. Levinson. 2018. A dynamic mechanism for allosteric activation of Aurora kinase A by activation loop phosphorylation. *eLife*. 7:e32766.
- Barr, D., T. Oashi, ..., A. van der Vaart. 2011. Importance of domain closure for the autoactivation of ERK2. *Biochemistry*. 50:8038–8048.
- Ferrell, J. E., Jr., and S. H. Ha. 2014. Ultrasensitivity part II: multisite phosphorylation, stoichiometric inhibitors, and positive feedback. *Trends Biochem. Sci.* 39:556–569.
- Chinchilla, D., L. Shan, ..., B. Kemmerling. 2009. One for all: the receptor-associated kinase BAK1. *Trends Plant Sci.* 14:535–541.
- Liebrand, T. W., H. A. van den Burg, and M. H. Joosten. 2014. Two for all: receptor-associated kinases SOBIR1 and BAK1. *Trends Plant Sci.* 19:123–132.
- Macho, A. P., and C. Zipfel. 2014. Plant PRRs and the activation of innate immune signaling. *Mol. Cell*. 54:263–272.
- Belkhadir, Y., and Y. Jaillais. 2015. The molecular circuitry of brassinosteroid signaling. *New Phytol.* 206:522–540.
- Cheng, W., K. R. Munkvold, ..., J. Chai. 2011. Structural analysis of *Pseudomonas syringae* AvrPtoB bound to host BAK1 reveals two similar kinase-interacting domains in a type III Effector. *Cell Host Microbe*. 10:616–626.
- Yan, L., Y. Ma, ..., Z. Lou. 2012. Structural basis for the impact of phosphorylation on the activation of plant receptor-like kinase BAK1. *Cell Res.* 22:1304–1308.
- Moffett, A. S., K. W. Bender, ..., D. Shukla. 2017. Molecular dynamics simulations reveal the conformational dynamics of *Arabidopsis thaliana* BRI1 and BAK1 receptor-like kinases. *J. Biol. Chem.* 292:12643–12652.
- Moffett, A. S., K. W. Bender, ..., D. Shukla. 2017. Allosteric control of a plant receptor kinase through S-glutathionylation. *Biophys. J.* 113:2354–2363.
- Moffett, A. S., and D. Shukla. 2018. Using molecular simulation to explore the nanoscale dynamics of the plant kinome. *Biochem. J.* 475:905–921.
- Wang, Y., Z. Li, ..., W. Shui. 2014. Assessment of BAK1 activity in different plant receptor-like kinase complexes by quantitative profiling of phosphorylation patterns. *J. Proteomics*. 108:484–493.
- Perraki, A., T. A. DeFalco, ..., C. Zipfel. 2018. Phosphocode-dependent functional dichotomy of a common co-receptor in plant signalling. *Nature*. 561:248–252.
- Wang, X., U. Kota, ..., S. D. Clouse. 2008. Sequential transphosphorylation of the BRI1/BAK1 receptor kinase complex impacts early events in brassinosteroid signaling. *Dev. Cell*. 15:220–235.
- Miao, Y., W. Sinko, ..., J. A. McCammon. 2014. Improved reweighting of accelerated molecular dynamics simulations for free energy calculation. *J. Chem. Theory Comput.* 10:2677–2689.
- Prabakaran, S., G. Lippens, ..., J. Gunawardena. 2012. Post-translational modification: nature's escape from genetic imprisonment and the basis for dynamic information encoding. *Wiley Interdiscip. Rev. Syst. Biol. Med.* 4:565–583.
- Humphrey, W., A. Dalke, and K. Schulten. 1996. VMD: visual molecular dynamics. *J. Mol. Graph.* 14:33–38, 27–28.
- Huang, J., and A. D. MacKerell, Jr. 2013. CHARMM36 all-atom additive protein force field: validation based on comparison to NMR data. *J. Comput. Chem.* 34:2135–2145.

32. Jorgensen, W. L., J. Chandrasekhar, ..., M. L. Klein. 1983. Comparison of simple potential functions for simulating liquid water. *J. Chem. Phys.* 79:926–935.
33. Bastidas, A. C., M. S. Deal, ..., S. S. Taylor. 2013. Phosphoryl transfer by protein kinase A is captured in a crystal lattice. *J. Am. Chem. Soc.* 135:4788–4798.
34. Roberts, E., J. Eargle, ..., Z. Luthey-Schulten. 2006. MultiSeq: unifying sequence and structure data for evolutionary analysis. *BMC Bioinformatics.* 7:382.
35. Case, D. A., I. Y. Ben-Shalom, ..., P. A. Kollman. 2018. AMBER 2018. University of California, San Francisco.
36. Miyamoto, S., and K. A. Kollman. 1992. SETTLE: an analytical version of the SHAKE and RATTLE algorithm for rigid water models. *J. Comput. Chem.* 13:952–962.
37. Darden, T., D. York, and L. Pedersen. 1993. Particle mesh Ewald: an  $N \log(N)$  method for Ewald sums in large systems. *J. Chem. Phys.* 98:10089–10092.
38. Miao, Y., V. A. Feher, and J. A. McCammon. 2015. Gaussian accelerated molecular dynamics: unconstrained enhanced sampling and free energy calculation. *J. Chem. Theory Comput.* 11:3584–3595.
39. Phillips, J. C., R. Braun, ..., K. Schulten. 2005. Scalable molecular dynamics with NAMD. *J. Comput. Chem.* 26:1781–1802.
40. Shirts, M. R., and J. D. Chodera. 2008. Statistically optimal analysis of samples from multiple equilibrium states. *J. Chem. Phys.* 129:124105.
41. Beauchamp, K. A., J. D. Chodera, ..., M. R. Shirts. pymbar 3.0.4 (Chodera Lab). <https://github.com/choderalab/pymbar>.
42. Kluyver, T., B. Ragan-Kelley, ..., C. Willing; Jupyter Development Team. 2016. Jupyter Notebooks—a publishing format for reproducible computational workflows. In *Positioning and Power in Academic Publishing: Players, Agents and Agendas*. F. Loizides and B. Schmidt, eds. IOS press, pp. 87–90.
43. Shukla, D., Y. Meng, ..., V. S. Pande. 2014. Activation pathway of Src kinase reveals intermediate states as targets for drug design. *Nat. Commun.* 5:3397.
44. Hu, X., L. Hong, ..., J. C. Smith. 2016. The dynamics of single protein molecules is non-equilibrium and self-similar over thirteen decades in time. *Nat. Phys.* 12:171–174.
45. Ye, W., M. Götz, ..., C. Sönnichsen. 2018. Conformational dynamics of a single protein monitored for 24 h at video rate. *Nano Lett.* 18:6633–6637.
46. Inkscape Project Team. 1991. Inkscape 0.91. Free Software Foundation <http://inkscape.org>.
47. Hunter, J. D. 2007. Matplotlib: a 2D graphics environment. *Comput. Sci. Eng.* 9:90–95.

**Biophysical Journal, Volume 118**

**Supplemental Information**

**Structural Consequences of Multisite Phosphorylation in the BAK1 Kinase Domain**

**Alexander S. Moffett and Diwakar Shukla**

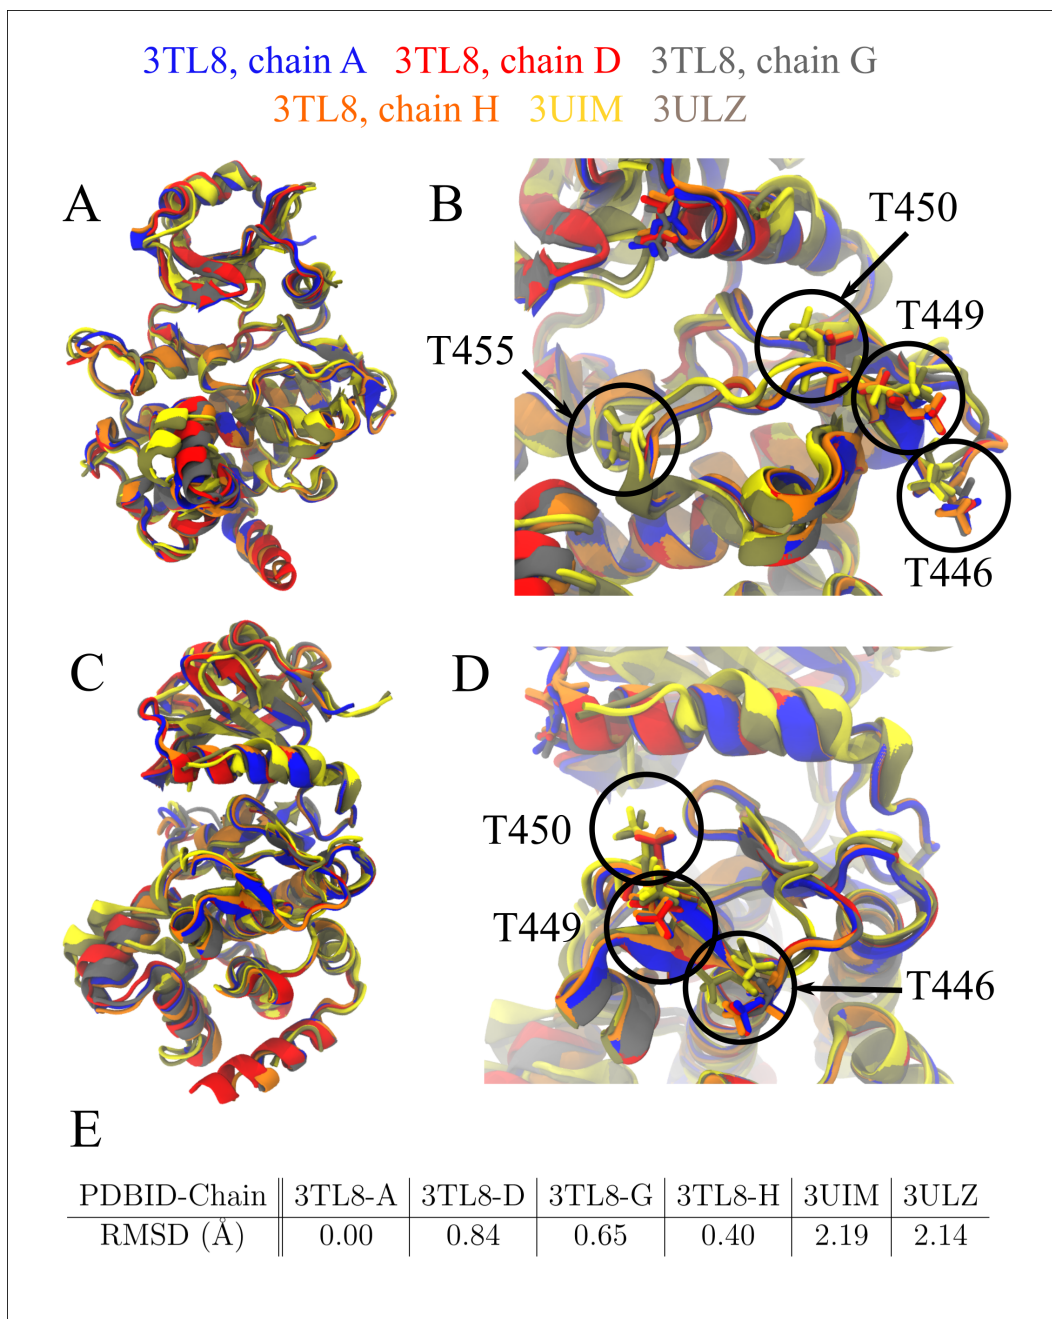

**Figure S1:** Overview of the BAK1 kinase domain crystal structures currently available on the PDB. **A** Structural alignment of all six currently available BAK1 kinase domain crystal structures. Structures were aligned in VMD using MultiSeq. **B** A closeup view of the BAK1 structural alignment, oriented as in **A**. The positions of each activation loop threonine that can be phosphorylated are noted. **C** A view of the BAK1 structural alignment in **A** shown rotated 90° roughly along the principal axis. **D** A closeup of **C**. Note the disorder in the  $\alpha$ C helix in PDBID 3UIM and 3ULZ, as well as their subtle difference in activation loop conformation near T446 from the remaining four structures. **E** Backbone RMSD of each crystal structure to PDBID 3TL8 chain A. The backbone atoms in the set of common residues for all six structures was used to align each other structure to 3TL8 chain A and measure the RMSD.

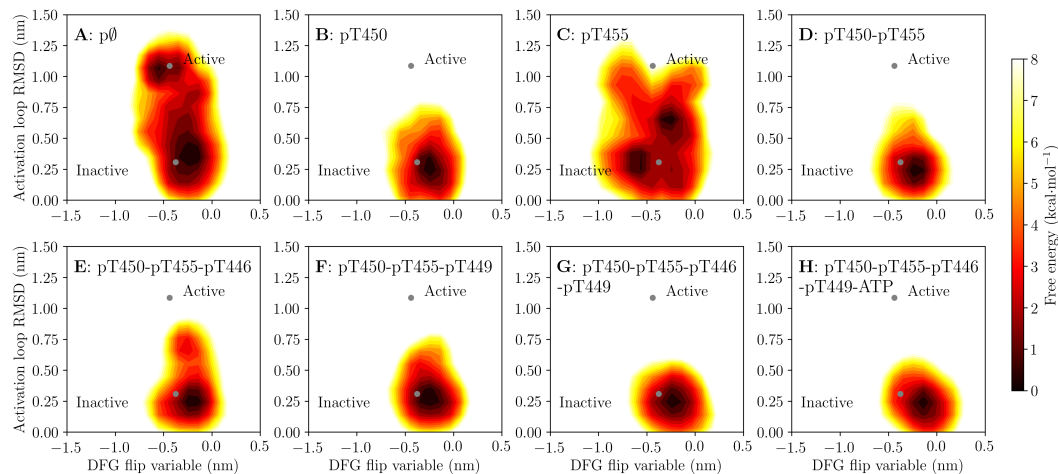

**Figure S2:** Free energy landscapes over a collective variable describing a DFG flip and the activation loop RMSD as defined in the main text. The DFG flip variable was defined as the distance between L404  $\alpha$ -carbon and C4 of the F435 side chain minus the distance between D416  $\alpha$ -carbon and C4 of the F435 side chain. The notation  $p0$  is used as shorthand for the unphosphorylated BAK1 kinase domain. The PMFs were calculated from GAMM simulations reweighted using MBAR.

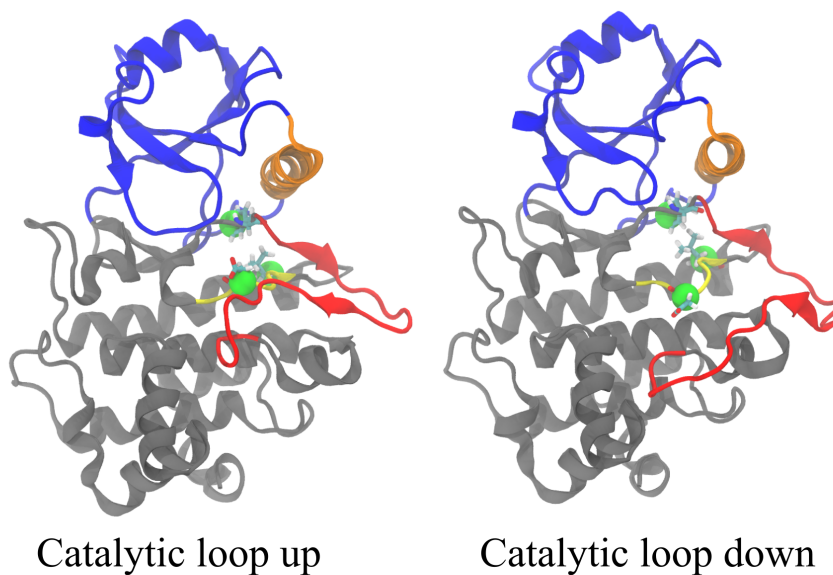

**Figure S3:** Flip of the catalytic loop in BAK1 away from the active site, resulting in a greater distance between D416 and F435.

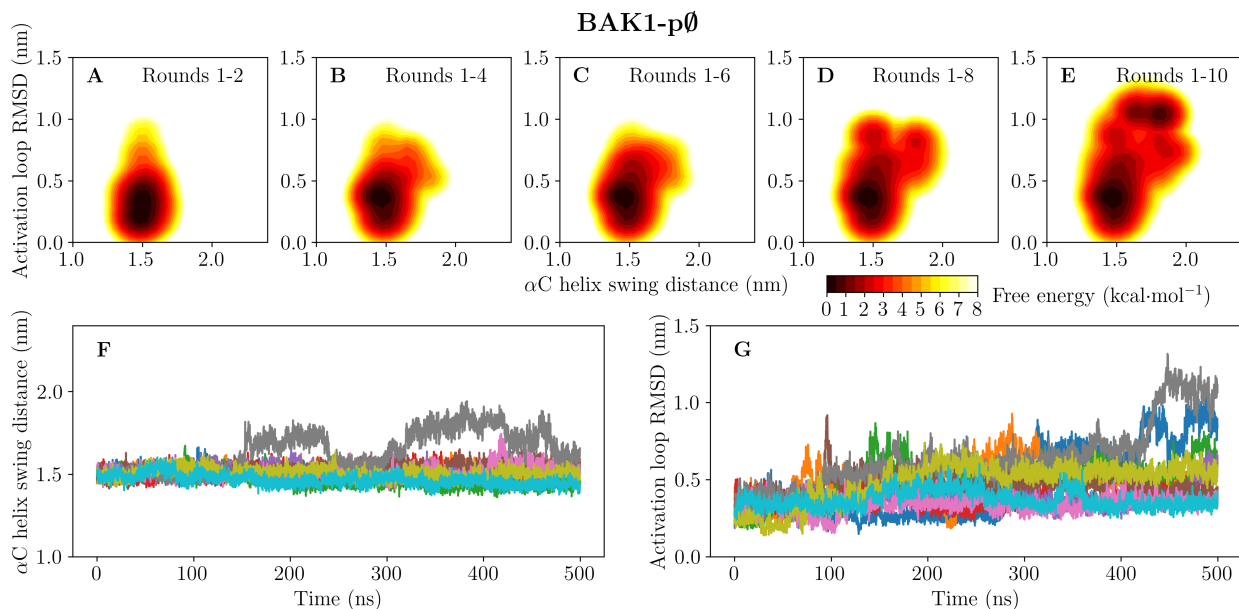

**Figure S4:** **A-E** Two-dimensional PMFs over the activation loop RMSD to a crystal structure (3TL8, chain A) and the  $\alpha$ C helix swing distance with progressively more sampling used. **F** The  $\alpha$ C helix swing distance with time for each of the 10 replicate GAMM simulations. **G** The activation loop RMSD with time for each of the 10 replicate GAMM simulations.

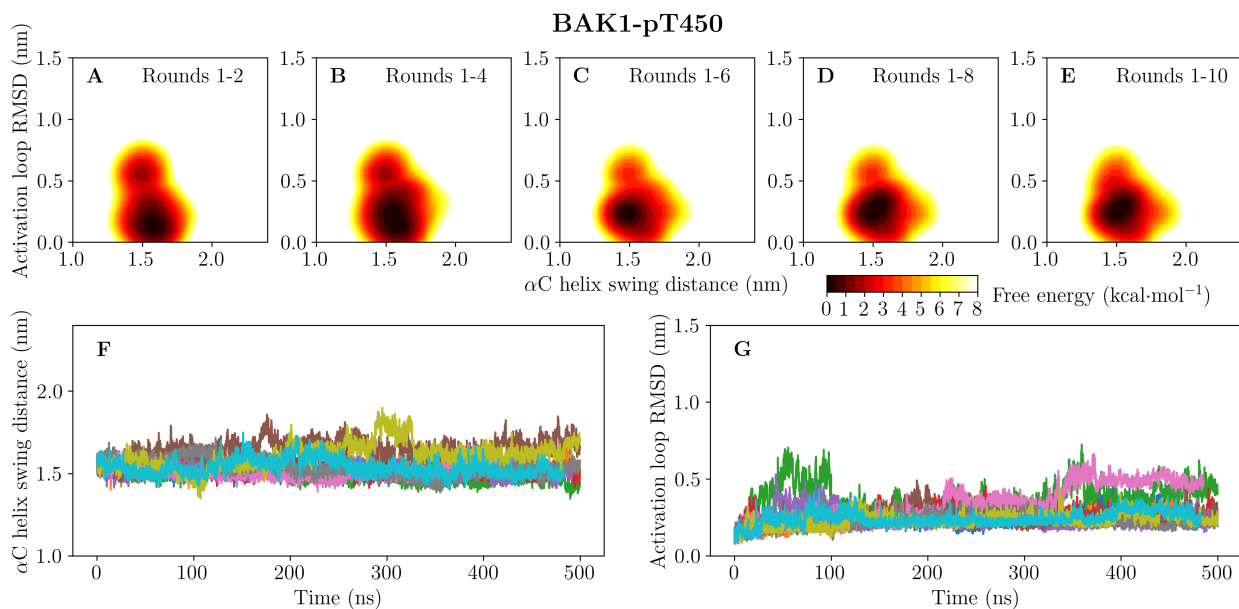

**Figure S5:** **A-E** Two-dimensional PMFs over the activation loop RMSD to a crystal structure (3TL8, chain A) and the  $\alpha$ C helix swing distance with progressively more sampling used. **F** The  $\alpha$ C helix swing distance with time for each of the 10 replicate GAMM simulations. **G** The activation loop RMSD with time for each of the 10 replicate GAMM simulations.

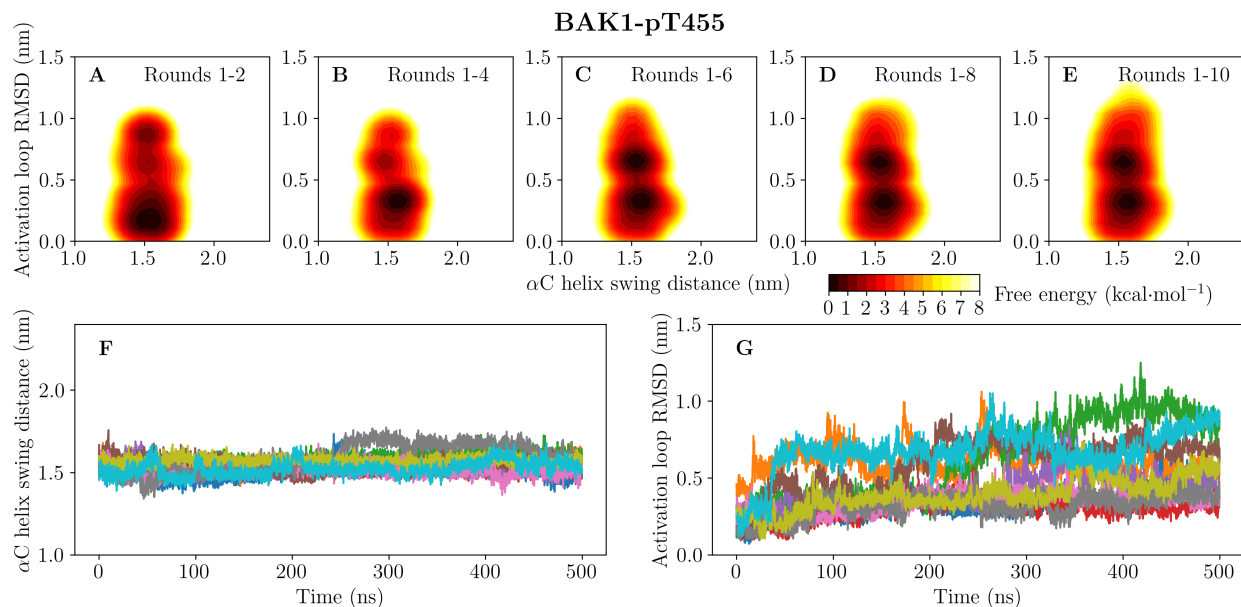

**Figure S6:** **A-E** Two-dimensional PMFs over the activation loop RMSD to a crystal structure (3TL8, chain A) and the  $\alpha$ C helix swing distance with progressively more sampling used. **F** The  $\alpha$ C helix swing distance with time for each of the 10 replicate GAMM simulations. **G** The activation loop RMSD with time for each of the 10 replicate GAMM simulations.

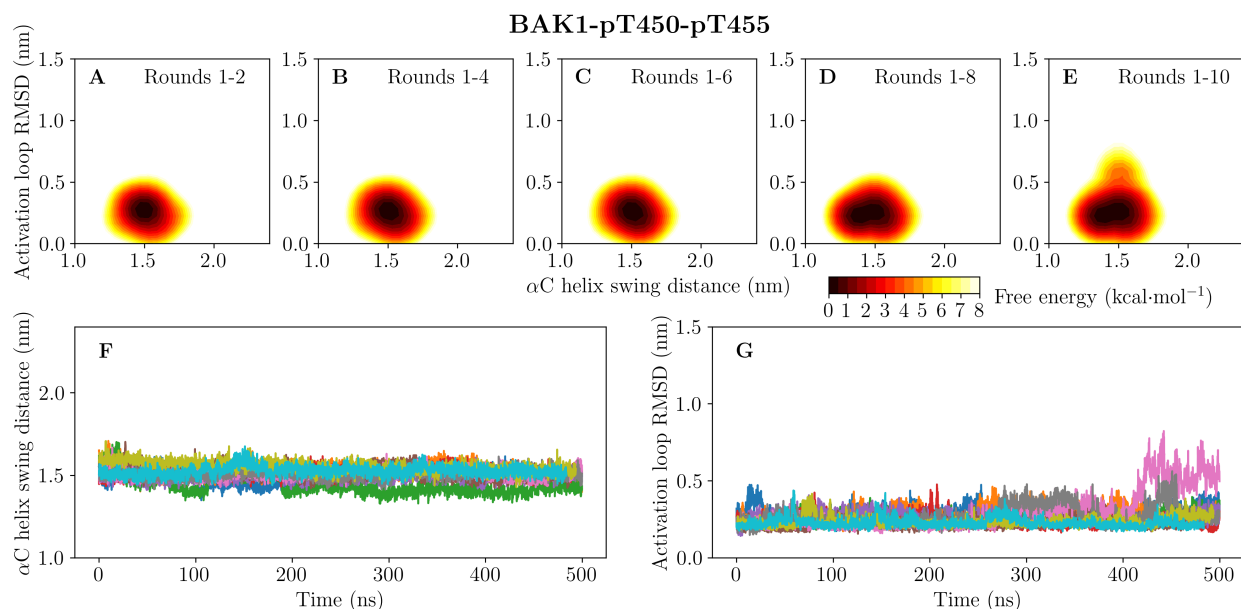

**Figure S7:** **A-E** Two-dimensional PMFs over the activation loop RMSD to a crystal structure (3TL8, chain A) and the  $\alpha$ C helix swing distance with progressively more sampling used. **F** The  $\alpha$ C helix swing distance with time for each of the 10 replicate GAMM simulations. **G** The activation loop RMSD with time for each of the 10 replicate GAMM simulations.

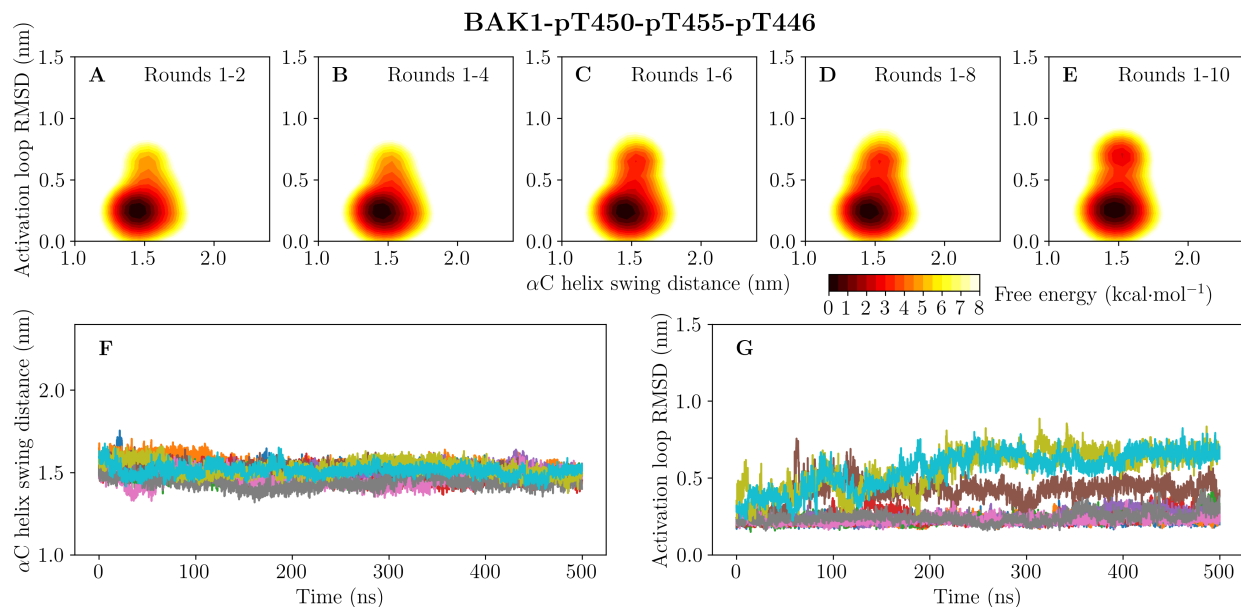

**Figure S8:** **A-E** Two-dimensional PMFs over the activation loop RMSD to a crystal structure (3TL8, chain A) and the  $\alpha$ C helix swing distance with progressively more sampling used. **F** The  $\alpha$ C helix swing distance with time for each of the 10 replicate GAMM simulations. **G** The activation loop RMSD with time for each of the 10 replicate GAMM simulations.

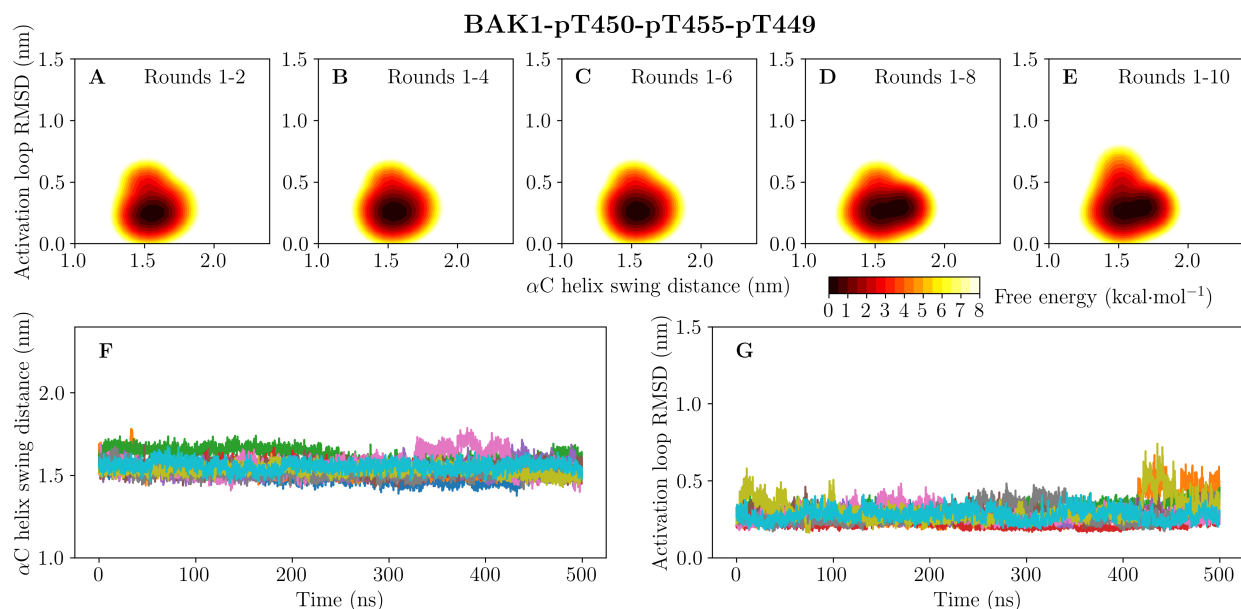

**Figure S9:** **A-E** Two-dimensional PMFs over the activation loop RMSD to a crystal structure (3TL8, chain A) and the  $\alpha$ C helix swing distance with progressively more sampling used. **F** The  $\alpha$ C helix swing distance with time for each of the 10 replicate GAMM simulations. **G** The activation loop RMSD with time for each of the 10 replicate GAMM simulations.



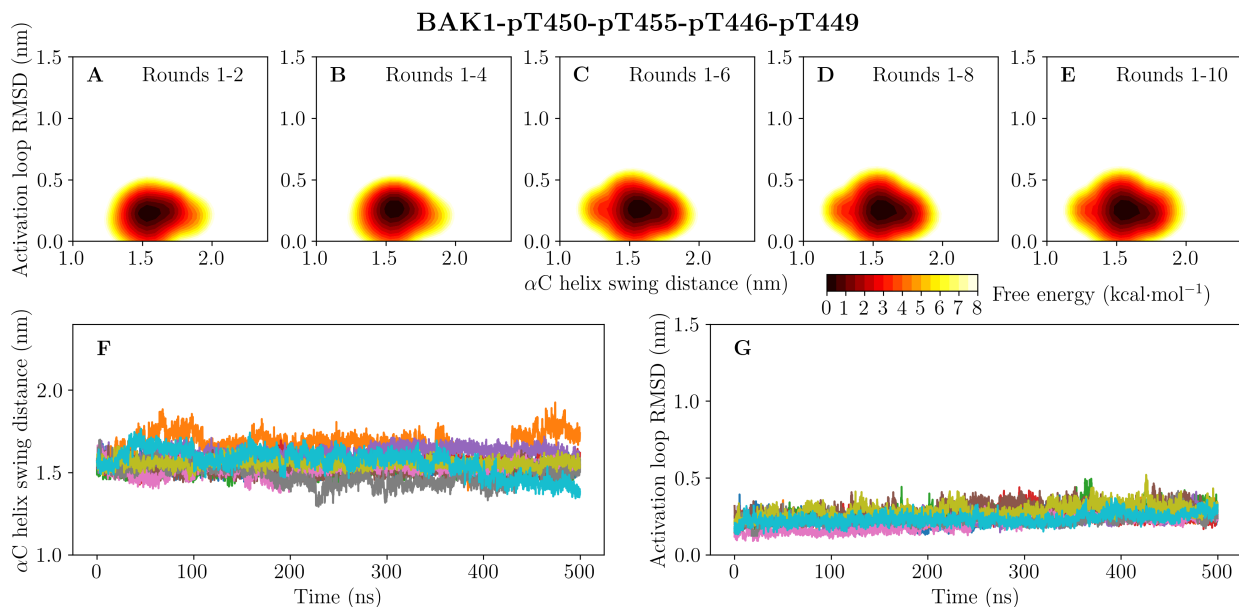

**Figure S10:** **A-E** Two-dimensional PMFs over the activation loop RMSD to a crystal structure (3TL8, chain A) and the  $\alpha$ C helix swing distance with progressively more sampling used. **F** The  $\alpha$ C helix swing distance with time for each of the 10 replicate GAMM simulations. **G** The activation loop RMSD with time for each of the 10 replicate GAMM simulations.

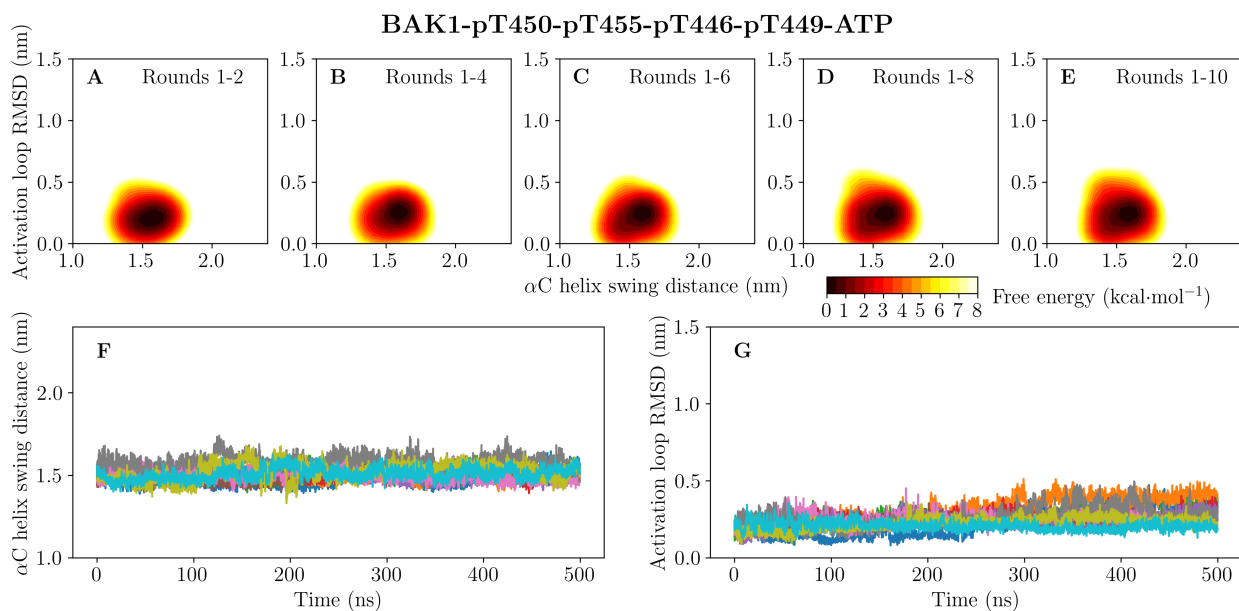

**Figure S11:** **A-E** Two-dimensional PMFs over the activation loop RMSD to a crystal structure (3TL8, chain A) and the  $\alpha$ C helix swing distance with progressively more sampling used. **F** The  $\alpha$ C helix swing distance with time for each of the 10 replicate GAMM simulations. **G** The activation loop RMSD with time for each of the 10 replicate GAMM simulations.

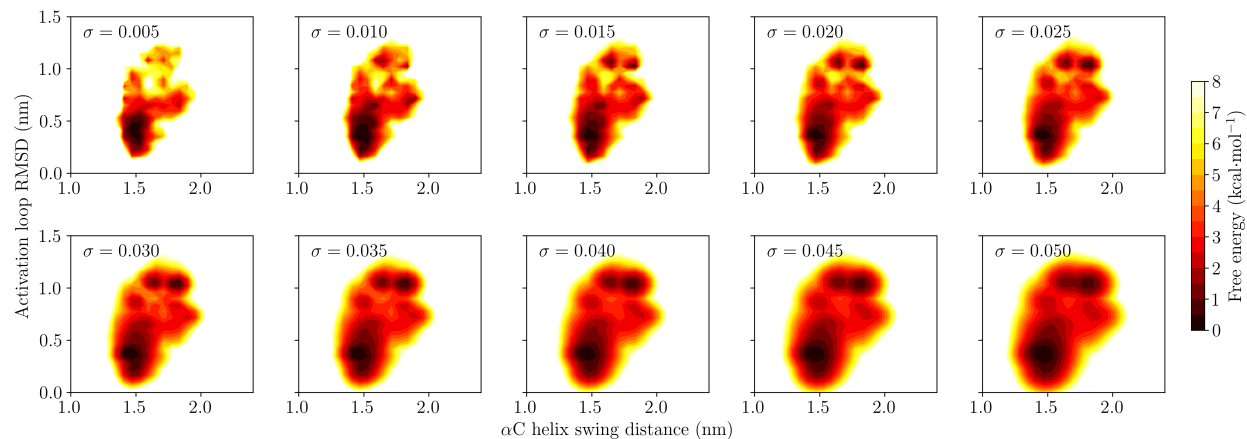

**Figure S12:** Two-dimensional PMFs of unphosphorylated BAK1 over the activation loop RMSD to a crystal structure (3TL8, chain A) and the  $\alpha$ C helix swing distance, with the Gaussian basis function bandwidth varying from 0.005 nm to 0.05 nm.

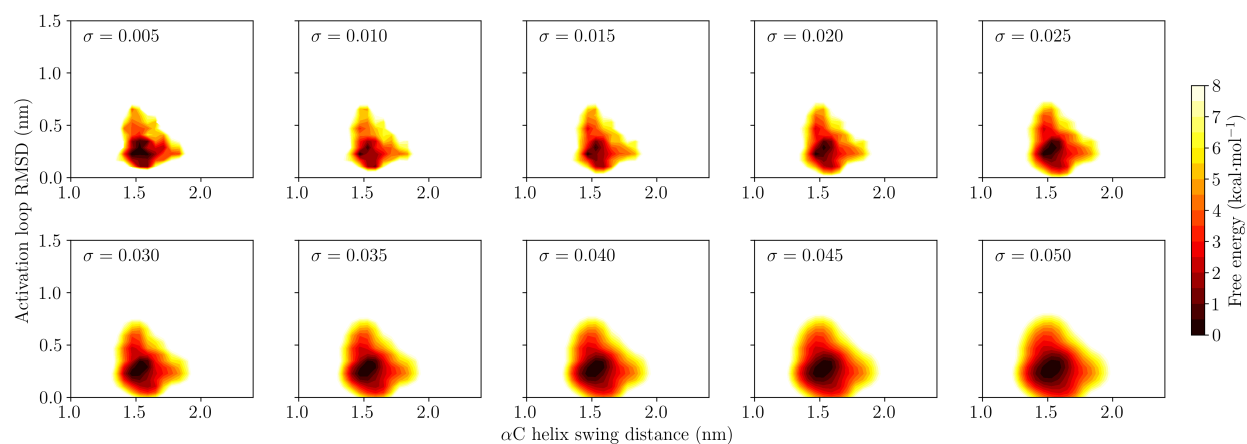

**Figure S13:** Two-dimensional PMFs of BAK1 pT450 over the activation loop RMSD to a crystal structure (3TL8, chain A) and the  $\alpha$ C helix swing distance, with the Gaussian basis function bandwidth varying from 0.005 nm to 0.05 nm.

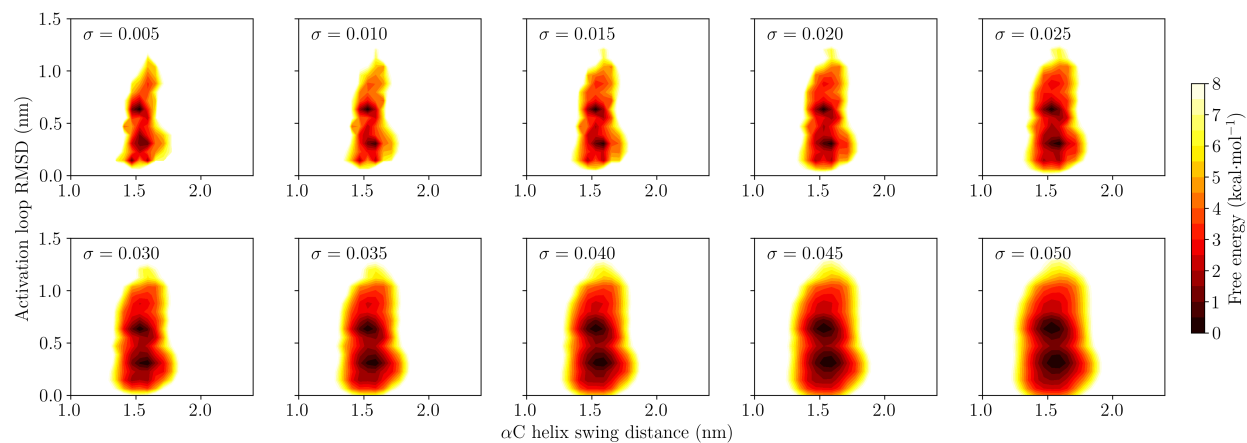

**Figure S14:** Two-dimensional PMFs of BAK1 pT455 over the activation loop RMSD to a crystal structure (3TL8, chain A) and the  $\alpha$ C helix swing distance, with the Gaussian basis function bandwidth varying from 0.005 nm to 0.05 nm.

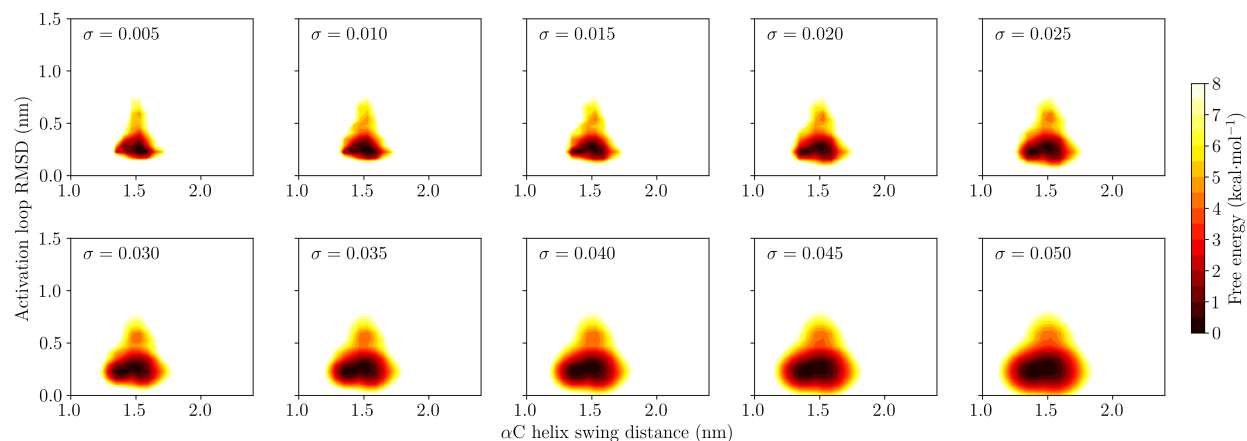

**Figure S15:** Two-dimensional PMFs of BAK1 pT450-pT455 over the activation loop RMSD to a crystal structure (3TL8, chain A) and the  $\alpha$ C helix swing distance, with the Gaussian basis function bandwidth varying from 0.005 nm to 0.05 nm.

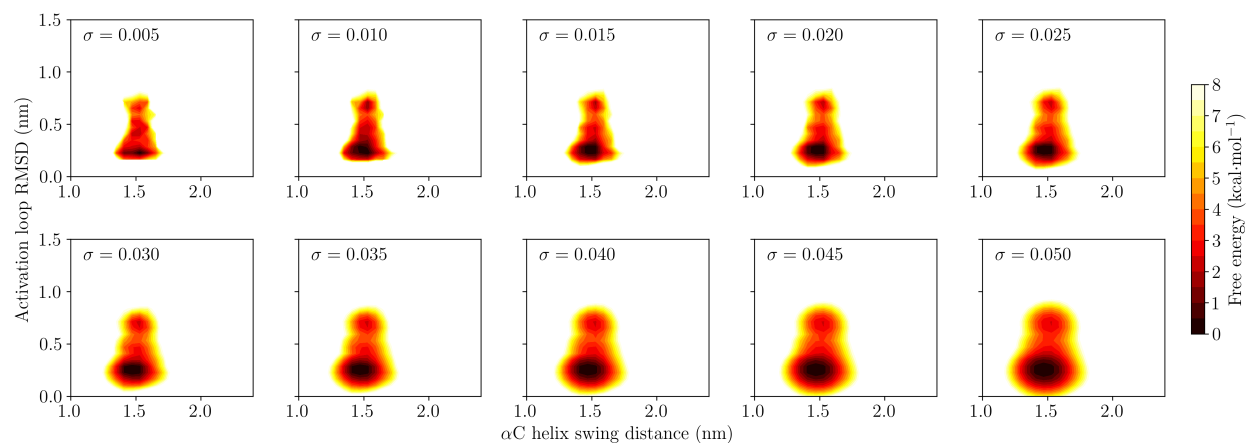

**Figure S16:** Two-dimensional PMFs of BAK1 pT446-pT450-pT455 over the activation loop RMSD to a crystal structure (3TL8, chain A) and the  $\alpha$ C helix swing distance, with the Gaussian basis function bandwidth varying from 0.005 nm to 0.05 nm.

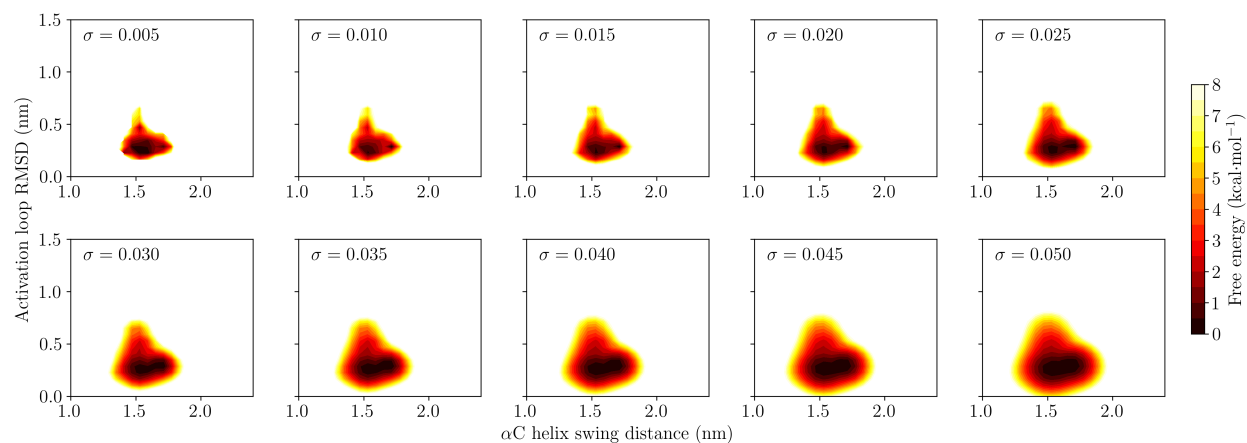

**Figure S17:** Two-dimensional PMFs of BAK1 pT449-pT450-pT455 over the activation loop RMSD to a crystal structure (3TL8, chain A) and the  $\alpha$ C helix swing distance, with the Gaussian basis function bandwidth varying from 0.005 nm to 0.05 nm.

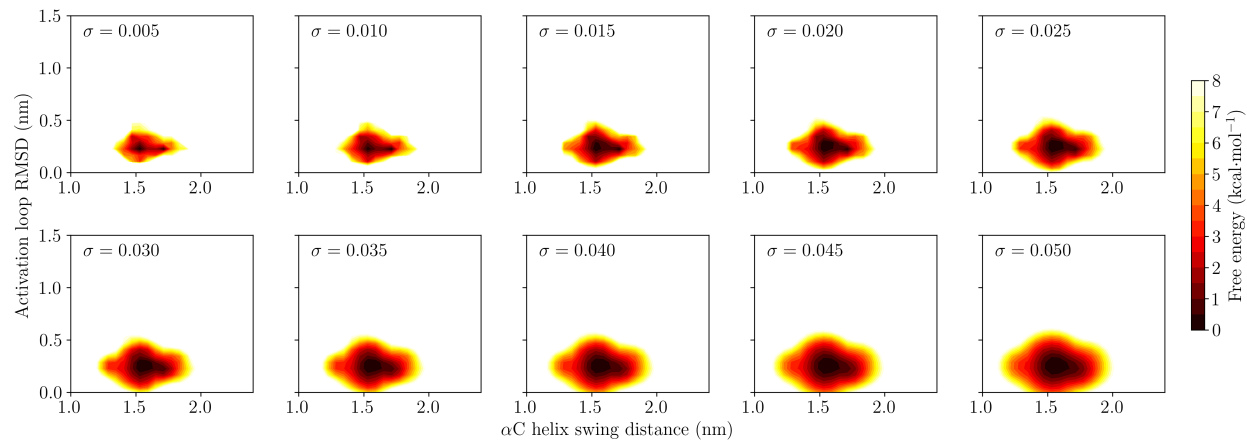

**Figure S18:** Two-dimensional PMFs of BAK1 pT446-pT449-pT450-pT455 over the activation loop RMSD to a crystal structure (3TL8, chain A) and the  $\alpha$ C helix swing distance, with the Gaussian basis function bandwidth varying from 0.005 nm to 0.05 nm.

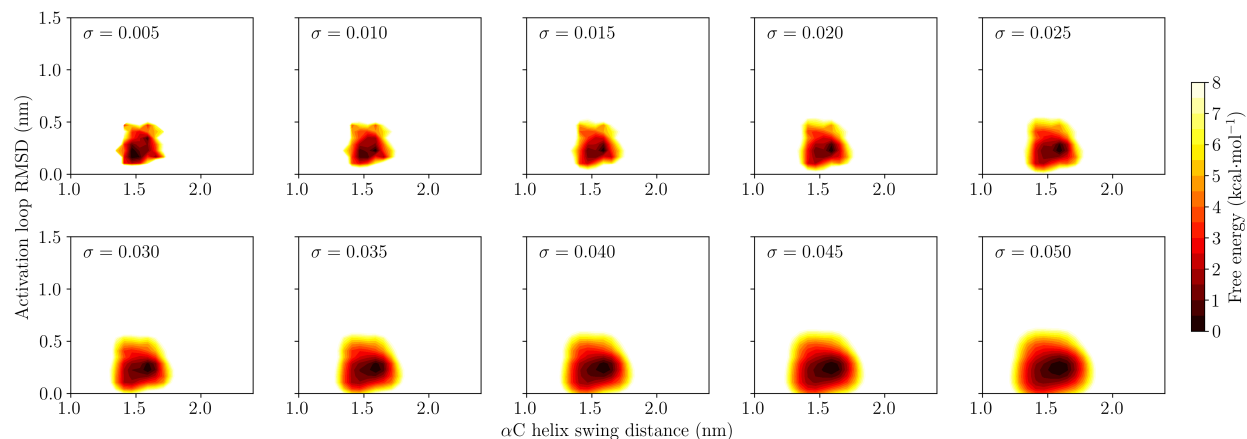

**Figure S19:** Two-dimensional PMFs of ATP-bound BAK1 pT446-pT449-pT450-pT455 over the activation loop RMSD to a crystal structure (3TL8, chain A) and the  $\alpha$ C helix swing distance, with the Gaussian basis function bandwidth varying from 0.005 nm to 0.05 nm.

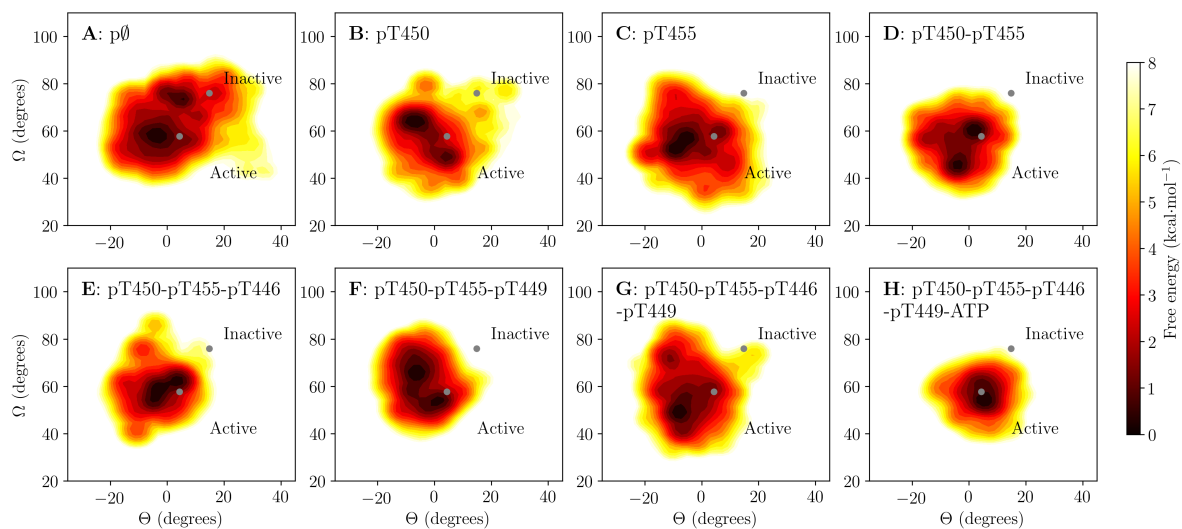

**Figure S20:** PMFs over the BAK1 inter-lobe angles  $\Omega$  and  $\Theta$ . The notation  $p\emptyset$  is used as shorthand for the unphosphorylated BAK1 kinase domain. The PMFs were calculated from GAMM simulations reweighted using MBAR.

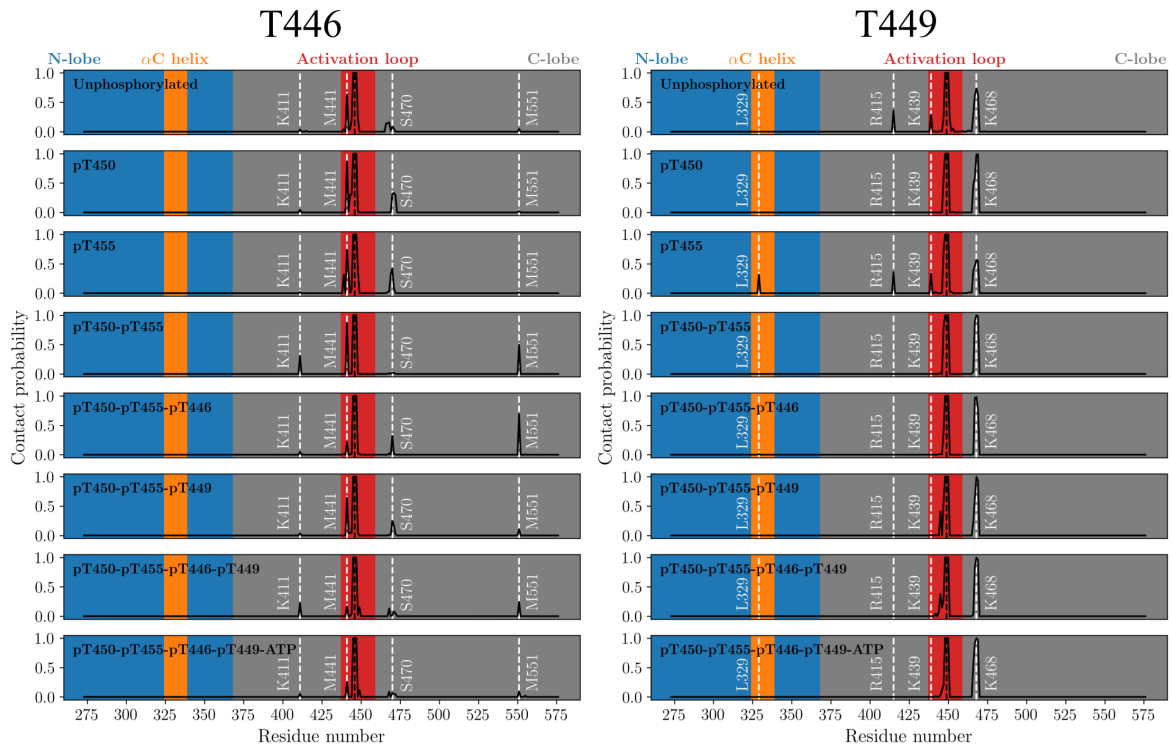

**Figure S21:** Contact probabilities for BAK1 T446 and T449 in each mod-form, reweighted using MBAR. The black dotted lines represent the reference threonine residue, while white dotted lines denote contacting residues of interest.

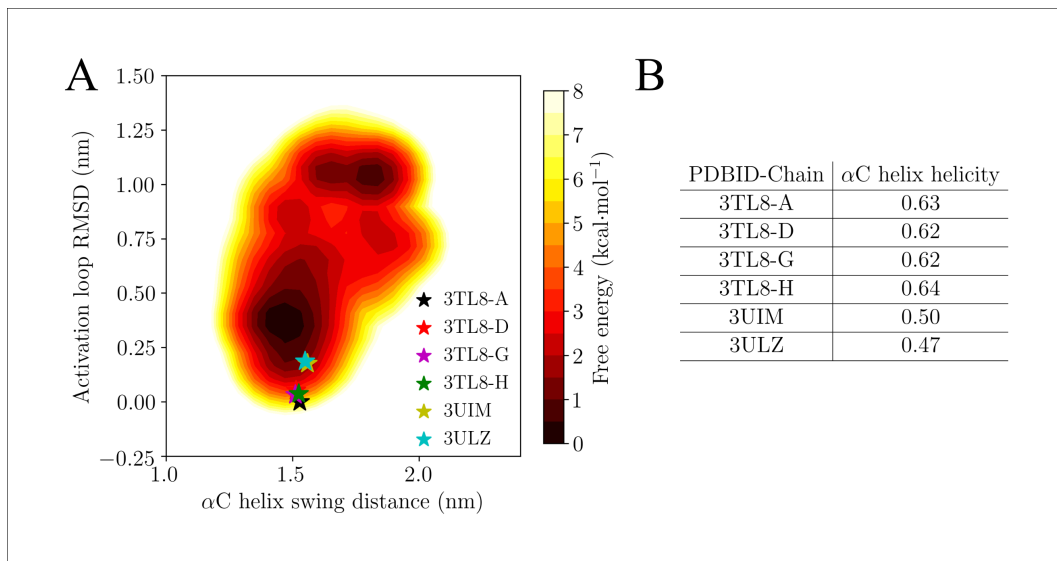

**Figure S22:** **A** The two-dimensional PMF of unphosphorylated BAK1 over the activation loop RMSD to a crystal structure (3TL8, chain A) and the  $\alpha$ C helix swing distance, with the location of each crystal structure on the landscape indicated. Analysis was performed on the set of common residues for all six structures. **B** The helicity of the  $\alpha$ C helix in all currently available BAK1 kinase domain crystal structures. For this measurement as well, analysis was performed on the set of common residues for all six structures.
